# Supplementary material for: Cross-talk between red blood cells and plasma influences blood flow and omics phenotypes in severe COVID-19
Source: eLife. 2022 Dec 20;11:e81316. doi: 10.7554/eLife.81316 (PMC9767455; doi:10.7554/eLife.81316)
Supplement: Figure 3—source data 1. [file elife-81316-fig3-data1.xlsx]

## Sheet: Master plasma
	Group	shape_ratio	echi	L_tryptophan	kynurenine	Trp_Kyn	L_alanine	L_arginine	L_asparagine	L_aspartate	L_glutamate	L_glutamine	L_histidine	L_leucine	L_lysine	L_methionine	L_phenylalanine	L_proline	L_serine	L_threonine	L_tyrosine	L_valine	L_cystine	Adenosine	Adenine	Guanine	dCMP	Thymidine	Uracil	Inosine	Hypoxanthine	Xanthine	Allantoate	x5_Hydroxyisourate	Urate	x2__3__CyclicCMP	x5_6_Dihydrothymine	Pyridoxal	x4_Pyridoxate	Pyridoxamine5__phosphate	Nicotinamide	Phosphate	Diphosphate	D_Glucose	D_Glucose6_phosphate	D_Glyceraldehyde3_phosphate_GlyceronePhosphate	x2_3_Phospho_D_glycerate	Pyruvate	Lactate
1	01-Ctrl in Ctrl	0.0344977	0	35907260	239052	150.207	6654366	897922	272664	37562.8	1111657	7087190	2397197	41288630	5110390	2940673	8160698	22804070	608619	1411403	13000900	27208690	474044	126209	577530	115050	21493.6	184585	335054	32108.8	3819988	200810	871177	77755.3	9344084	15750.6	879528	115440	24587.1	182757	283159	5306176	56359.1	3350971	27983.3	1464793	7159.65	1363119	25971970
2	01-Ctrl in Ctrl	0.0344977	0	40773210	238205	171.169	6970756	865540	277163	45086.6	1324516	7969912	2645379	47674510	5378876	2738042	7942590	26301070	638176	1730790	15378330	24455900	468526	97828.5	647898	91427.8	23083.3	160805	238378	34944.9	3589907	249878	1002175	63717.8	10913890	19008.4	866746	91968.5	29181.8	283968	251133	6125218	83310.6	3140237	29263	576343	9544.09	1491284	28776070
3	01-Ctrl in Ctrl	0.0404335	0	43373290	183426	236.462	7169370	3096180	271762	36478	380117	7227056	1989022	33510680	5056049	3668294	11311880	20699920	574776	2362254	13500240	27343830	566213	103929	939349	147721	10407.1	150067	403620	24453.5	1339041	247212	683491	40063.2	11419880	10758.3	1531521	140743	48165	300362	247483	4870676	63162.3	5101288	4623.81	449301	2985.92	559248	11885440
4	01-Ctrl in Ctrl	0.0404335	0	37885920	116206	326.023	5664140	3755834	247311	47192.7	310924	7559600	2441756	28505050	3821899	3474204	6550512	20202510	656169	1803764	10913340	29956380	611306	84991.2	78702.8	142858	17249.9	130700	89775	23337.5	902525	125694	753351	77616.6	19467480	15354.1	1321971	93750.9	19652.4	420206	249572	6038560	71291.4	6555978	10075.2	903913	10334.4	672106	12817410
5	01-Ctrl in Ctrl	0.0829732	0	51564080	195847	263.287	8522125	3276338	432512	43221.7	419971	8541575	3184152	70896290	7233198	6004104	11585640	54003630	750488	1702630	22324620	44388900	612152	116225	241822	248615	23446.8	150420	375071	36872	2156931	289409	801820	86562.4	11951200	18951	2865723	90172.2	49964.7	311731	277804	8330002	128307	4930984	15599.7	734418	10925.9	881205	15719410
6	01-Ctrl in Ctrl	0.0829732	0	57133470	184800	309.164	9633397	2748864	440498	23119.5	472177	8241866	2462590	60149470	5910500	5350266	11323450	61819000	687571	1974712	22363690	49634780	503462	104655	955702	219020	22934.9	125497	450550	33835.1	1975423	241606	674923	50933.4	8541752	23290.7	3517726	115961	69200.1	266456	254533	5799462	80754.2	2953330	9347.53	655523	4795.71	588660	11692460
7	04-Patient in Patient	0.302459	4.96129	28525980	297271	95.9596	3690206	885478	208450	46845.4	926059	6769586	2076716	57008350	4665042	3695883	13300190	20716580	350456	1880004	28631060	50446080	479772	92743.1	708950	147574	29112.4	148050	183162	42118.9	7805228	228746	637256	56417.9	13407190	26491.8	4857103	148757	57831.8	257415	316454	6249956	116463	3706739	6747.49	581301	6012.89	674919	24761930
8	04-Patient in Patient	0.302459	4.96129	34006680	229230	148.352	3434997	1007329	229025	49830.8	1072190	7215626	2153779	61252220	4784690	3253854	12691370	23627200	366594	1936121	26152050	44334180	522754	109568	618094	111982	37110.1	121868	214317	30864.7	7101018	152809	675640	63025.7	15932790	29187.7	4743006	173442	60761.8	320257	274007	6725352	122856	4646051	18846.4	512773	8280.2	827637	27095970
9	04-Patient in Patient	10.6529	18.3506	7883674	1641187	4.80364	3692828	385272	152015	89092	1260914	7235892	1230998	18495150	2231917	1182694	7667662	12270400	254175	654741	8589699	15897270	123332	1570516	974345	46926.2	2470.11	127053	277924	32411.3	9884749	440826	257038	63286.4	3022111	8604.21	220052	814288	28229	32055.2	484047	7042524	152549	4918724	33845.6	575349	29388.9	1281080	36133500
10	04-Patient in Patient	10.6529	18.3506	6069622	1634240	3.71403	3452509	518311	133749	90184.6	1203630	7250062	1203214	15829570	2149170	1097799	5712598	11662650	279544	585773	7689768	15343380	119744	1342649	564025	51212.7	6251	129848	168561	27667.6	8076086	310240	259495	82981.4	5018418	8091.17	262243	822362	52147.4	28042.6	491397	6939706	123925	6123182	30569.7	1325796	33874.4	1229196	37025680
11	04-Patient in Patient	34.6757	64.3964	13375320	139112	96.1481	3606183	511178	291118	53567.8	2097779	8772461	1241536	32684500	4505931	1983681	5717540	15907330	654911	1115858	6569850	42491640	231966	2782190	444861	93929.9	16216.1	125330	209631	105732	14830340	360872	646767	69599.3	5511590	16388.4	1095728	93520.8	11795.6	127400	304487	3563700	32483.8	3996621	12152.8	473829	7813.59	574956	28189080
12	04-Patient in Patient	34.6757	64.3964	13958270	145866	95.6927	3308307	626636	233456	44583	1943995	7654214	1393905	33086250	4035193	2075629	5647434	17731710	555139	1070217	7067092	39983920	265467	2167724	560465	77015.9	22019.7	132780	269120	102920	14777180	329842	678038	65939.3	8027042	21090	1075014	106736	11516.9	72264.3	335291	3691982	37703.8	3891559	13078.7	1014670	14450.5	522469	24673580
13	04-Patient in Patient	2.18807	19.6529	22966880	347226	66.1438	4141865	1261020	148014	47163.6	2250849	4043504	1611146	54606060	6363926	2844073	10473470	27595810	279695	1046096	19714380	27362040	312214	123805	385046	111886	24475.3	142219	195332	67956.1	9396569	473609	967500	38560.3	4083958	22084.2	375998	102235	53797.1	165034	252771	3856707	42288.6	5555188	7147.7	1032872	9017.56	561852	24065790
14	04-Patient in Patient	3.03355	23.1417	23636550	185910	127.14	5523878	1346898	222855	65508.4	2321171	4039081	1782231	61353000	5880950	3517013	11550820	22006210	420256	1317484	20564470	37158220	633956	63039.2	507593	123327	28592.3	139899	312087	20891.9	4796977	338156	710717	33309.9	3931373	31549.8	602104	90115.8	18219.8	160688	310142	5778288	84171.7	7401302	9885.92	1012236	3946.27	1136828	21610980
15	04-Patient in Patient	3.03355	23.1417	34197140	247513	138.163	7509350	925955	232720	74966.1	3886044	4139914	2171440	86929600	7099302	3574449	17855370	34591310	377300	1747979	18950480	59942740	610510	64159.1	654822	155311	24089.9	123032	371266	13187.4	4241983	212658	826825	21865.1	10359060	25669.9	879600	194138	160996	198903	389922	8133624	185489	5686016	14609	880914	10293	1219219	23929740
16	04-Patient in Patient	6.20984	7.73374	15648900	1212953	12.9015	4939242	792431	172732	72916.4	2780101	4962708	1940782	30319010	3814034	2020463	11923050	11417930	228921	641309	14650930	17719620	356117	984603	464587	74489.7	14843.2	168500	193631	212652	4402510	303536	360948	44590.9	5290943	11502.4	358011	685257	13213	51713.7	636807	4519440	50520.5	5787380	1496.16	876075	8723.96	1183943	21011650
17	04-Patient in Patient	6.20984	7.73374	11160300	1071431	10.4163	5361988	684565	186445	63222.1	2878690	5342781	1798020	29150780	3958706	2254131	12129210	11822450	205990	769760	10813740	18582950	357542	1335070	541086	91411.5	17262.5	125324	241527	215717	4494690	275708	394935	45562.2	7773984	17137.3	328553	733743	28065.8	59726.2	647140	5267198	69709.3	4470769	3332.82	797635	6482.64	1040570	19210080
18	02-Ctrl in Patient	99.0244	81.7788	28466950	206995	137.525	6032594	636149	246155	43368.8	1567756	7003444	1817141	40981750	4655189	2385568	7794772	28932970	516998	1597077	10937570	29141500	327089	381121	657567	82064.4	21816.9	136137	168683	168867	6379754	155532	685717	80359.7	13191780	16634.4	866509	100492	131065	263822	318102	5807906	95261.5	2530398	19733.5	768005	8188.13	1096032	30145010
19	02-Ctrl in Patient	99.0244	81.7788	32365460	215854	149.942	6308462	653616	268739	35897.1	1611168	7215588	2209516	37805890	4816040	2366659	7590172	24613170	556466	1537284	12441060	22240400	335108	482142	655573	83748.5	14624.2	163057	323605	173069	7030814	229326	748535	61777.2	7037962	15025	864092	114467	23137	186490	296976	5577146	65816.1	2717222	14671	466775	3876.08	1112069	29635330
20	02-Ctrl in Patient	294	91.2611	116169400	624557	186.003	10226150	597790	282714	22762.2	1900258	6004244	3104873	74297420	6726888	4438978	25671620	74802390	549087	2132656	18600360	50541560	392040	105446	1116922	159237	17801.3	139872	189242	17448.3	7192438	376823	1178916	64087.8	5058630	28240.5	2653882	234331	165628	280906	429031	14157610	282250	2032014	28514.6	2748535	28185.4	1864698	37102450
21	02-Ctrl in Patient	294	91.2611	134574000	568069	236.897	11596030	613200	220882	32773.7	2091695	6230818	3198855	69396840	8352376	4526864	24695660	75472930	547938	2315668	25791540	52280460	406922	74144.9	949007	171638	14900.9	138438	298371	23189.1	7845912	443031	1223932	56030.5	5852424	39692.5	2640936	214553	158418	180729	424045	13080560	299756	2622567	29318.6	846263	23759.1	2232916	44027400
22	02-Ctrl in Patient	0.612232	0.0683761	41064140	381386	107.671	6963048	953190	235495	36784.3	1353166	6796546	2556861	39220280	4715908	2763203	12824800	26379180	560505	1445645	13144980	30436150	356428	281390	568728	102988	17418.5	146309	280656	108305	5790636	249802	926511	66642.8	9446488	14076.3	820562	110019	32755.7	220885	342566	5753584	75431.3	3094126	15598.8	660452	6021.75	1075394	25437670
23	02-Ctrl in Patient	0.612232	0.0683761	48987480	345789	141.669	7210574	782217	246015	41490	1713826	7120694	2393541	45393890	6052424	3124295	10731220	25698190	584384	1586698	14778540	21885390	385920	301166	599039	114800	16619.2	150547	396210	108008	7044390	307965	962532	77585.5	10026900	15429.8	802852	149737	142203	268572	358843	7708914	104971	2443961	13590	649048	12237.5	1521494	36759820
24	02-Ctrl in Patient	2.62581	0.379919	85283740	362288	235.403	8836301	3705838	321878	45643.9	722221	10031000	3596761	70938560	7954234	6517304	19387860	28502930	746368	2929542	30311300	44392120	476378	55142.8	17201.5	254561	22959.5	184053	66672.5	103116	4493604	185472	1394070	130800	19574650	24061.9	2317411	210245	126519	313458	264592	1509026	1792.16	6806936	13836	1079327	1531.82	1610332	39005650
25	02-Ctrl in Patient	2.62581	0.379919	8133.78	1812.8	4.48686	1409554	16578.3	40208.2	27039.2	20358.4	113675	34423.5	145991	18886	2948.99	36640.1	346619	56235.4	14543.4	12414.2	471922	0	1369.2	13117.2	1854.19	0	172043	64611.2	0	27983.8	0	0	0	1095.99	0	196027	8632.31	482.331	0	234782	23768.5	611.645	7626.99	296.44	294653	454.778	57108.9	146008
26	02-Ctrl in Patient	18.5714	22.1684	39489510	262748	150.294	7860126	2143125	388518	37412.7	623755	7584702	2621582	50586530	5197734	4948556	11602730	46811560	660332	1442749	16609940	40265700	343264	486482	662868	141778	26735.5	122940	236512	87469.1	4413200	208214	755738	57001.7	12157840	21916.7	2937813	194475	160701	264468	289958	6389680	122765	3590664	13374.2	506291	9580.37	747409	20417390
27	02-Ctrl in Patient	21.6977	13.522	55813470	197304	282.881	9578934	2392758	369139	57972	704168	8297252	2251392	64626500	6099208	5411868	11693340	54767230	699186	2038498	23430020	44966990	371138	73922.7	991798	197900	25314.4	146379	360318	282058	6735186	229973	812316	66516.3	8556499	20112.2	3642552	121535	59025.3	278763	279864	7377186	116880	4644412	10250	482198	4853.89	574160	19328380
28	02-Ctrl in Patient	21.6977	13.522	164970900	499612	330.198	11188230	2137626	305849	43681	648743	6014950	3835508	101305100	9067853	9776619	36097240	134038700	605146	2033766	33459480	90599040	393233	54473.6	1658676	376926	21536.5	158519	414381	333958	11782790	459455	1113632	56629	5676590	49645	8113182	268432	288270	289032	367732	18245730	355457	2777552	16494.4	6844024	26880.5	975962	25371400
29	03-Patient in Ctlr	0.208637	3.99152	37353610	306934	121.699	3807808	945811	240831	55083.2	1256300	6777652	2331094	58346760	5092282	3578353	13636520	22931190	388696	2066179	25479280	45250660	484069	105999	722265	142784	30252.7	154529	231670	306159	8810729	213713	774862	62711.4	11220730	22778.9	5016082	137038	56395.8	191034	287996	6129600	77602.4	4654164	13553.1	447122	3135.48	761876	26539670
30	03-Patient in Ctlr	0.208637	3.99152	51268340	422422	121.367	4792632	990259	227341	60535.1	1548645	8065426	2619843	88628100	6127154	4866390	21792890	31217620	408029	2605926	30723770	40362100	528626	98144.5	801076	197526	26904.5	152803	215832	341193	11828190	298828	863613	69813.6	10054210	22760.5	4912574	177639	86374.2	202730	281953	8921233	131519	4118482	18176.6	561679	7930.11	930292	34808450
31	03-Patient in Ctlr	0.11735	1.94004	23292850	394227	59.0848	5694240	864664	169336	59230	3425476	4406758	1688721	57025030	6723084	2937308	11992840	33956710	335755	1530361	18452060	33430730	303906	59536.5	782532	113921	25625.1	140074	245063	489617	9009437	435951	1132571	34979.4	5936706	21357.1	536178	156121	157932	211248	268202	5377582	70336.9	3508491	2505.42	618294	5537.85	529062	23181080
32	03-Patient in Ctlr	0.11735	1.94004	18833700	299198	62.9472	4490050	1021005	146713	52072.4	2717127	3636063	1640080	45274240	5250960	3363942	9418197	30310160	284721	1128506	16052570	32934930	214713	92290.8	564936	130940	29599	132097	195375	461748	9970168	475602	943906	39895.9	6583640	30634	484800	118291	107518	159783	269735	4672998	65682.5	4304062	1922.8	1097919	3225.95	473377	23578540
33	03-Patient in Ctlr	0.746348	6.25	36693720	2514463	14.5931	8655963	504380	201715	78743.9	3773361	3151482	2630684	49866490	5839084	4041206	31351020	35763310	235903	1042647	20855640	45801640	452473	2396186	973932	179099	20060.6	115123	276666	446461	7963488	463558	568991	13780.4	3884138	20671.9	1037884	1550221	89456.8	41800.9	1295744	13162790	445898	2810276	3540.14	1089700	15668.6	1749718	32778190
34	03-Patient in Ctlr	0.746348	6.25	32779420	2325036	14.0985	8127586	467240	189350	86897.6	4071936	2688164	2207644	45807280	4804874	2913229	27089890	35009510	217862	1067341	14308840	36399090	442102	2049850	723392	109056	14028	122447	247969	344109	5393811	307208	448868	12606.2	4323254	18267.8	1029552	1480152	100161	80752	964771	13646430	399030	3421797	5172.67	1082735	14251	1663805	33556480
[truncated: 755 more columns]

## Sheet: Master RBC
Name		shape_ratio	echi	L_alanine	L_arginine	L_aspartate	L_glutamate	L_glutamine	L_histidine	L_leucine	L_lysine	L_methionine	L_phenylalanine	L_proline	L_serine	L_threonine	L_tryptophan	L_tyrosine	L_valine	L_cystine	ATP	ADP	AMP	Adenosine	GTP	GDP	Guanosine	Guanine	Cytidine	dTMP	UTP	UDP	IMP	Inosine	Hypoxanthine	Xanthine	Allantoate	x_S_____Allantoin	x5_Hydroxyisourate	Urate	x5_6_Dihydrothymine	Pyridoxal	x4_Pyridoxate	Pyridoxamine5__phosphate	Nicotinamide	UDP_glucose	ADP_D_ribose	NADH	Phosphate
1	01-Ctrl in Ctrl	0.0344977	0	3213301	11750.2	2025438	5244738	11284380	1780696	13307620	1473465	231402	16545570	10369560	499034	745507	54764740	2015753	32518500	0	5179814	1784258	366732	9194438	19408.4	171262	2724.33	11950.9	121588	9384.83	7618.23	116643	1759118	182830	4389963	181573	19517.5	2663.59	4587638	3749812	383643	72772.8	974603	26307.3	9476651	727654	71563.6	183788	10342230
2	01-Ctrl in Ctrl	0.0344977	0	3847509	39485.4	1667081	5397038	11247630	1621042	11905140	1441925	265848	16053180	10149620	468378	744250	55677640	1694277	31673390	0	4696110	1785584	369176	9592648	22005.7	189279	0	13793.9	103821	40198.4	10340.6	103099	2080093	177330	4457012	158780	17385	12485.2	4632252	3085678	398041	65226.4	795401	25936.9	9312604	730281	91275.2	184450	10317500
3	02-Ctrl in Patient	0.612232	0.0683761	3650115	170614	1611118	4673070	5522548	3030875	21913370	2597774	516207	21314280	14555500	604950	1307061	11131240	1581484	33132660	65130.3	6172730	1780446	333651	3211439	42104.1	26244.8	2378.64	12677.1	10048	23168290	18041.9	381098	1996523	210515	4854082	232572	132542	92483.3	1868078	14774910	708794	111911	695481	77116.6	10652380	637377	203173	38266.6	8017568
4	02-Ctrl in Patient	0.612232	0.0683761	3290382	148646	1551490	4490070	5163010	2825780	19198390	2527517	499172	21067380	13314720	505412	1206535	12065030	1532663	30647850	47768.5	6312178	2102853	375721	3773695	38777.9	102728	0	16235.1	16277.5	32223.7	15863.2	415034	2181713	213932	5164418	239474	131367	92797.9	1683622	15269020	657479	103566	626003	86473.9	9727651	782313	271056	30580.4	7860988
5	01-Ctrl in Ctrl	0.0404335	0	2835129	52363.1	1819195	4180462	8467233	1722571	15307150	1621691	554132	14680700	16024550	419824	739576	36377150	1510492	30909290	11609.8	4882972	1755342	320113	6761882	33110.3	74047.7	4094.63	13348.5	69310.2	13998	12107.6	156901	5340484	331169	7190894	151698	49551.9	6833.48	3138612	7243498	703646	73602.7	630529	35390.4	9211207	575318	188058	214393	7187544
6	01-Ctrl in Ctrl	0.0404335	0	3006333	104760	1481860	3200698	7463282	2027268	16462070	1872195	598342	17544660	19254780	395924	781177	25854390	3051648	29608710	33775.9	3761928	2133308	558285	7306348	22765.4	55905.6	3766.08	12458.1	64786.3	21920.2	10793.7	607319	4231083	305897	7821008	142163	112335	5955.3	2473681	8730535	886189	65353	612212	57189.2	8375868	436049	310272	203098	6600746
7	02-Ctrl in Patient	2.62581	0.379919	2836566	60697.7	2201960	2140322	4316924	2461432	14497320	1861449	493159	23223700	10363340	362702	678787	10163140	2154057	24343270	17634.4	6711070	2247791	529075	6799978	70270.6	40895.3	3769.46	16524.7	18644.1	7212.06	14876.4	41252.9	2532905	363123	4882794	158963	12382.4	10029.3	2079975	7746938	285690	76730.5	589063	55370.2	9178176	886918	124059	227343	7600048
8	02-Ctrl in Patient	2.62581	0.379919	3079544	66932.2	2150049	2423397	4811176	2207043	15244800	1942508	549035	22786760	11154580	362688	614236	11045770	2086889	23969540	15116.7	6454056	2087574	435656	7442112	60993.2	55958	2442.88	17208	16420.8	7311.59	18330.6	119549	2566744	257493	5584252	202482	31749.6	8663.89	2131434	7569264	349334	76534.9	603291	58244.8	9337588	749404	86468.6	227674	7447058
9	01-Ctrl in Ctrl	0.0829732	0	5618132	86803	1921556	8037998	17881890	1890950	27197640	2454272	590429	11909520	16415760	993403	1248593	14854480	1308128	61596600	2099.25	6478746	3188693	1031993	7404824	18080.5	312017	4416.66	11126.8	21539.5	12810.5	8640.6	79684.2	2612460	121986	8541824	158186	23712.6	19783.9	7754392	7673276	965380	76504.8	114942	54178.4	8666727	821449	12577.6	28472.9	10662640
10	01-Ctrl in Ctrl	0.0829732	0	4727508	55064.2	2745723	7520088	14360180	1756977	26025150	2211536	546401	10968910	15883420	866881	1188181	14412020	1128812	54043820	3053.26	7621248	2572986	416328	7003156	41704.5	150200	0	12455.5	0	1794307	22888.1	119863	1284733	161578	9431799	180523	25216.2	10795.6	6349612	8085798	909686	82459.1	142201	58213.7	9241541	776375	25714.2	46574.4	7366038
11	02-Ctrl in Patient	21.6977	13.522	2692992	65851.6	1816819	1684334	4380578	2423569	13317400	1936077	481308	23805140	12426640	371890	744246	8044438	3965564	22511970	26167.5	5612880	2530685	658170	6817110	54019.8	42483.8	0	20740.7	7691.73	13859.7	11026.2	343457	4293070	320597	5352464	176341	74905	17063	1283747	9108911	348886	69964.8	447116	45474	10405290	650444	218247	247938	7197030
12	02-Ctrl in Patient	21.6977	13.522	2110494	235913	1195872	1522173	4024576	1797138	14276240	1976308	534187	20267230	10921300	323772	744447	9674839	2512529	19758110	58485.6	2786918	1407761	403279	6809710	20447.7	12105.7	22387.6	23257.6	10761.5	60414.3	10192	882274	2647300	324237	5019698	184358	191367	36534.7	1173608	10121620	360674	50128.5	287406	76476.3	7771960	524351	239874	46982.2	5159330
13	03-Patient in Ctrl	0.208637	3.99152	3684998	78589.9	2281170	5118008	11340140	1787194	22081570	2099390	585542	8956287	13813790	776136	1064975	8870584	1154448	42752940	18755	5527142	2144735	518041	6993188	19135.2	195656	0	9207.39	6505.32	12620	7032.63	211491	1820707	136054	8812077	156048	82378.4	30998.3	4258925	10442890	682427	75937.5	105236	48234.2	8529321	603793	128019	69568.5	8114300
14	03-Patient in Ctrl	0.208637	3.99152	3620711	116162	2157397	4813390	10632140	1716797	22292870	2055394	679434	9413601	15280450	717732	1178172	8623100	1218367	43628420	65743.9	4530340	1233291	179374	6554040	15202.1	79361.4	21716.7	3404.53	8537.93	110473	5173.14	67964.4	656842	75591.1	10462420	83315.1	81099.9	17089.9	4154441	4622322	720118	44814.1	63615.4	54510.5	8765635	357234	50030.1	69204.5	5320818
15	04-Patient in Patient	0.302459	4.96129	3271983	83104.9	1353052	2651457	6080116	2002687	19114160	2301559	570436	13091420	21660150	552577	1086670	6804258	1645360	41880510	3594.74	7291772	1716770	310090	67130.6	40080.1	244000	0	11774.9	6203.79	9345.75	9775.47	117513	1064889	345178	822175	80198.9	44002.9	12671	2793994	14876310	758900	55262.4	112775	44037.8	8221144	789772	169562	69363.2	9350420
16	04-Patient in Patient	0.302459	4.96129	3685391	124202	1006650	3111063	7015596	2430248	22172810	2740957	671824	17937120	22465560	628202	1428622	6686398	3326219	46337520	0	7183008	1733448	229878	79920.3	32173.2	235265	0	14772.2	19281.8	13721.4	11978	220130	1303630	263584	1032186	33917.7	53790.7	13335.8	2942187	18273200	871514	63256.7	124817	49324.8	10103720	752157	174572	64567.6	9257992
17	03-Patient in Ctrl	0.0432161	0.168067	2661036	59058.8	2719495	3544961	3220388	2051086	23926470	2925789	670231	20511740	21314200	447750	1252405	6785934	4699814	39471460	15442.5	8529844	2923817	629288	66485.8	44930	29180.6	108505	131616	1011402	15461160	4723.8	49887.6	3351901	1242667	10448100	256579	43743.1	8028.8	1425521	5488666	340819	116019	154584	31764.7	9446342	879252	283431	182984	4549864
18	03-Patient in Ctrl	0.0432161	0.168067	3096519	139331	1994298	3634034	4202346	1925497	25899250	3178337	912383	15825900	24519480	373354	1238335	7880804	2373512	42622420	20665.6	5986276	2875480	714033	48404.7	42610.5	41975	31337.4	30294.3	1812265	16062	11443.8	591293	2190709	767928	9740909	334749	273964	8654.2	1226191	5994300	309260	68094.1	106513	63584.4	7779928	662699	210483	208770	4507902
19	04-Patient in Patient	10.6529	18.3506	3283705	217590	799758	3224947	5172392	2204455	19324430	2632830	594775	17559930	17769830	447059	1000087	6424398	2628186	38090760	3877.97	4627110	1470884	247544	3657992	18955.7	92360.6	0	15610.7	4763.28	30743.2	12718.3	469074	1390622	235792	1583478	102548	163748	11483.5	1850103	13831510	684152	55419.2	377673	47900.1	10039320	571200	202901	61936.2	6832176
20	04-Patient in Patient	10.6529	18.3506	2771157	153140	730864	3310138	4645836	2271262	17776100	2657212	533653	19908050	15229650	459893	1038774	7987766	2415194	34506340	36495.4	5229430	1823049	277851	4357796	27141.5	57311.1	0	7143.4	8630.04	26554.4	5497.98	465877	1625484	251511	1890584	143215	174449	14968.2	1593472	15991410	720276	73805.9	526213	46539.3	8657427	586574	239032	72079.6	6791442
21	03-Patient in Ctrl	0.0710718	0.480461	2741150	60416.3	2521582	2855766	3476033	1739881	22791470	2420706	676133	15923050	21228660	398042	1065088	7238144	3255511	36249770	4109.03	7802312	3431404	682884	121075	34438.3	107802	56841.3	66087.6	1055414	17417.6	12350	174922	4890116	1136455	11501140	284624	82189.3	10663.6	1163501	7170726	483233	77249.1	116686	46233.3	9846322	806596	349180	132119	4407564
22	03-Patient in Ctrl	0.0710718	0.480461	2458646	108824	2098160	2594582	3333033	1945527	24805350	2729836	969674	19951140	25120010	462308	1142896	10305860	3743503	37096050	7332.29	5198830	2945580	671457	127411	43857.9	107006	116121	115054	1133141	11904.3	2967.23	413527	6189062	2401924	13676710	357695	131647	35614.7	1142718	9759100	776160	73348.9	122497	75139.9	9408051	743226	352581	144832	5005468
23	04-Patient in Patient	34.6757	64.3964	3167436	96814.2	1910009	3681271	5603160	2552929	18089960	2890224	1169598	13487010	15082380	789370	1772145	6054678	1869490	36749800	0	5837240	4073651	1651692	82905.9	31442.5	231344	116394	208979	11096.8	24500	0	101626	5879310	2064150	9395226	41878	61293.4	15799.6	2274052	23327050	866271	72191	139074	48403.2	10092330	912190	186410	174629	3851002
24	04-Patient in Patient	34.6757	64.3964	3055940	203684	1619180	3358942	5072598	2476956	17978640	2809590	1118121	17822250	16751390	680869	1537481	5774004	2366705	35708880	0	5353370	3391561	1248025	84421.2	25694.9	209679	261040	241114	5763.43	24897.8	4668.34	185929	4902908	1846102	10559100	69766.3	82259.7	12152.5	2209211	23283220	900782	70790.4	121973	48038	9275540	756909	157880	146596	3818248
25	03-Patient in Ctrl	0.11735	1.94004	3955296	104757	2173037	2302721	3275806	1859013	32745460	2851107	894075	22365710	18733980	452065	1209720	14515440	4547668	47988170	6982.62	1828282	564236	74366.5	64346.3	5678.99	45252.4	0	17415.1	868338	17665.5	4230.61	7907.97	306022	75338.2	1455109	37013.3	43435.6	5885.77	1371502	888281	391208	30859.7	12529.2	101264	10624320	218902	26611.7	98570.8	5151140
26	03-Patient in Ctrl	0.11735	1.94004	4202824	123987	1909345	2476998	3468201	1780004	34156820	2753906	1102726	23300870	18260230	579684	1189656	13789870	4179976	48910890	8260.42	6849174	2594464	608534	68930.9	54231.7	204366	8206.49	16520.8	862660	23014.7	40734.6	120080	1400351	237845	1673498	154433	67158.3	11981.8	1668429	6902590	397189	83766.3	153143	83937.4	8515545	855107	127495	137899	12114310
27	04-Patient in Patient	2.18807	19.6529	3131760	206128	1404138	3098103	4321591	2482431	22676860	2527307	1096587	19863990	16183360	601559	1585427	9024675	3074009	32727630	15426.5	3534604	4153655	2740421	179049	7947.62	173320	448062	398708	5185.64	457955	0	302400	8232140	4933630	24865110	116422	149457	14678.7	1645767	23106070	1452990	91592.1	105151	58364.8	11421400	851169	250157	123242	5575566
28	04-Patient in Patient	2.18807	19.6529	2328730	379816	744720	2440888	5086666	2578733	30342660	2911256	1268846	40630560	17559130	482626	1544906	23962740	5711040	37753050	91536.5	2097751	3019257	1500575	190398	16162.9	15445.9	236451	193997	5137.59	16360.8	1686.58	2286866	2581936	1687491	11726940	181953	589172	121943	1241160	26220220	3011644	79603.8	83520	227437	8443913	556239	140422	230190	7710686
29	03-Patient in Ctrl	0.280675	1.97368	3425662	127983	1598960	1746097	3732858	2362683	28508500	3162546	813548	17476470	18905180	495762	1225344	13434280	3204281	40137520	75954.7	6652982	3102678	517377	128240	44717.7	38682.5	0	9330.86	986159	9079302	38430	377210	2228269	325727	2337268	157300	200067	39109.9	1299240	11005600	442837	69393.1	105890	93708.4	9558277	732510	244863	103624	10306780
30	03-Patient in Ctrl	0.280675	1.97368	3148146	176589	1438436	1637736	3639922	2234231	23143660	3085337	827396	17536560	19214220	522884	1196829	14486320	2430414	34580120	78931.8	4474838	2936725	975439	123358	29581.2	48347.7	0	14676.1	802934	62210	9602.33	874026	1984101	289729	2944627	137734	324753	28005	818282	12697020	467526	62465.4	105953	136152	7520046	522048	260731	126008	9575037
31	04-Patient in Patient	3.03355	23.1417	3925123	68520.4	1567451	2294152	5257067	2600252	29929920	2740960	1569515	19342780	40231240	676388	1374316	6185758	3292054	55990140	2994	7048410	3010738	811912	92288.9	28942.9	143418	80141.9	84862.2	17131.9	9417.68	13461.7	130666	3185481	908969	6361028	68833.1	65099.2	11954.9	2349654	17154420	2828061	74511.6	97591.6	43366.7	8713415	768034	160610	187965	3924307
32	04-Patient in Patient	3.03355	23.1417	4004337	13274.8	1542108	2282512	5215474	2423244	32506250	2662214	1662072	16470880	42665380	688443	1434640	6297170	3660717	55597760	0	6404192	2724371	723728	87372.8	24430	101290	93402.3	92146.9	11451.9	7894550	12053.5	75414.3	3464005	789927	6282636	49480.9	63025.9	12307.6	2382300	16198020	2836982	81832.5	119006	46710.6	9843748	679281	184322	207485	4254778
33	03-Patient in Ctrl	0.746348	6.25	4466874	142810	1946680	6837064	7879294	3572303	21521750	2728249	621709	23228680	13369900	720634	1405416	9631457	2108304	41510860	20026	7769550	2130937	346645	4656052	50263.1	208750	0	11477.1	11302.7	19821.6	30910.7	101382	1256262	181054	5160111	190052	36785.2	73314	3201209	12683930	703665	93589.9	911408	58475	8470951	828414	51792.4	43659.2	8523092
34	03-Patient in Ctrl	0.746348	6.25	5133204	248100	1309088	6203282	8847358	2856037	22803290	2718896	917235	25926160	15350850	794034	1675023	12300360	1997296	40955810	84411.8	6821154	1712433	219634	4545686	35306.8	62182.3	4745.92	13283.5	16965	523347	53243	398328	1956243	152868	7113512	255989	162679	95798.7	3000769	13870890	713311	96209.4	1134973	77866.9	8864249	679018	133889	129953	6669774
35	04-Patient in Patient	6.20984	7.73374	4752170	236396	1044464	3322111	7391648	2249552	27847170	2425553	986584	22669020	17572270	562748	1816742	17065790	3421691	52171640	37140.6	6764726	1992773	280865	109115	58554.7	124926	23663.2	27506.1	8170.1	181920	45764.2	311760	2734333	646952	8740921	91815.5	106856	32262.2	2730348	13957510	7134832	75925.5	110854	111338	8022114	730979	136684	171664	6481302
36	04-Patient in Patient	6.20984	7.73374	4460980	285641	1040594	3653217	7645902	2326939	27712950	2626754	999084	21943510	19403510	598452	1868836	19206110	3449061	53240590	106055	5789118	1506497	185118	103889	35781.8	60054.3	71961.8	52115	8918.58	5956.38	26074.8	506136	2407380	1769108	15636830	123423	169772	40034.9	2626063	17254650	7302946	69286.8	84135.6	124190	7502046	648026	142025	199010	5547166
[truncated: 994 more columns]

## Sheet: Correlation data-plasma
Correlations with echinocyte percentage								Correlations with shape ratio
	R	Insig	Neg Sig	Pos sig					R	Insig	Neg Sig	Pos sig
Phosphoserine_uM_	-0,33691	128935						MBL2	-0,34207	1321627
HydroxyhexanoylCarnitine_uM_	-0,33644	1286383						S_Glutathionyl_L_cysteine_uM_	-0,33226	1260649
Cys_Gly_uM_	-0,33492	1276996						Phosphoserine_uM_	-0,33119	125409
Thymidine	-0,33231	1260958						L_methionine_uM_	-0,32905	1241043
CRISP3	-0,3266	1226214						MASP2	-0,32108	1193169
GSN	-0,31742	1171585						Cys_Gly_uM_	-0,3136	1149293
SERPINA4	-0,30859	1120434						Pyridoxamine5__phosphate	-0,31253	114309
L_methionine_uM_	-0,30594	1105307						VCL	-0,31251	1142981
HEATR1	-0,30527	1101533						IGHV5_51	-0,30888	1122065
MBL2	-0,30255	1086176						SERPINA4	-0,29726	1056659
F13A1	-0,30142	1079866						dCMP	-0,29019	1018
KLKB1	-0,29824	1062091						x1_4_beta_D_Xylan_uM_	-0,28744	1003143
APOD	-0,2944	1040944						DHX33	-0,28425	0,986068
HexadecanoicAcid_uM_	-0,28339	0,981508						SHROOM3	-0,28425	0,986068
PLTP	-0,28173	0,972732						PON3	-0,28425	0,986068
OctadecanoicAcid_uM_	-0,27864	0,956481						RAP1B	-0,28425	0,986068
L_Cysteate	-0,2745	0,934906						FCGR3B	-0,28425	0,986068
PF4	-0,26524	0,887697						GP5	-0,28425	0,986068
L_cysteine_uM_	-0,26315	0,87726						TAGLN2	-0,28425	0,986068
PGLYRP2	-0,26308	0,8769						CAVIN2	-0,28425	0,986068
Glutathione_uM_	-0,26238	0,873414						PLEK	-0,28425	0,986068
x2_Hydroxyglutarate_uM_	-0,25916	0,857454						MMRN1	-0,28425	0,986068
x3_Sulfocatechol	-0,25288	0,826697						ARPC1B	-0,28425	0,986068
HexanoicAcid_caproate__uM_	-0,25211	0,822983						SLK	-0,28065	0,967019
IGHV5_51	-0,25094	0,817357						IGKV1_33	-0,2699	0,911332
IGHV3_43	-0,24933	0,809612						TF	-0,26285	0,875757
DIDO1	-0,24933	0,809612						APOF	-0,25973	0,860247
DHX33	-0,24933	0,809612						Var5	-0,25868	0,855052
KRT6B	-0,24933	0,809612						LUM	-0,2555	0,839441
SHROOM3	-0,24933	0,809612						HydroxyhexanoylCarnitine_uM_	-0,25375	0,830943
PON3	-0,24933	0,809612						PRG4	-0,25316	0,828098
RAP1B	-0,24933	0,809612						STOM	-0,24993	0,812479
KRT5	-0,24933	0,809612						DIDO1	-0,24872	0,806681
TENM4	-0,24933	0,809612						KRT6B	-0,24872	0,806681
FCGR3B	-0,24933	0,809612						TENM4	-0,24872	0,806681
SETD1A	-0,24933	0,809612						SETD1A	-0,24872	0,806681
COL5A3	-0,24933	0,809612						COL5A3	-0,24872	0,806681
KHSRP	-0,24933	0,809612						ABCA5	-0,24872	0,806681
UBR4	-0,24933	0,809612						S100A7	-0,24872	0,806681
ABCA5	-0,24933	0,809612						SACS	-0,24872	0,806681
FLG2	-0,24933	0,809612						TDRD7	-0,24872	0,806681
S100A7	-0,24933	0,809612						SERPINB4	-0,24872	0,806681
GP5	-0,24933	0,809612						S_Glutathionyl_L_cysteine	-0,24541	0,790941
SACS	-0,24933	0,809612						IGLV4_69	-0,24392	0,783913
TAGLN2	-0,24933	0,809612						MST1	-0,23989	0,765053
NFIB	-0,24933	0,809612						L_phenylalanine_uM_	-0,2391	0,761377
TDRD7	-0,24933	0,809612						PRTN3	-0,23843	0,758279
CAVIN2	-0,24933	0,809612						QSOX1	-0,23826	0,757459
SERPINB4	-0,24933	0,809612						GPX3	-0,23268	0,731843
PLEK	-0,24933	0,809612						IGHV7_4_1	-0,23128	0,725496
MMRN1	-0,24933	0,809612						N_Acetylornithine	-0,23084	0,723492
ARPC1B	-0,24933	0,809612						APOM	-0,22937	0,716857
IGKV2_28	-0,24805	0,803492						Fumarate_uM_	-0,22548	0,699426
HeptanoicAcid_uM_	-0,24751	0,800931						IGHV1_18	-0,2253	0,698623
SLC4A1	-0,24457	0,786961						D_Glucose_uM_	-0,22273	0,687273
STARD5	-0,24282	0,778716						C1R	-0,22253	0,686365
HydroxydodecanoylCarnitine_uM_	-0,24168	0,7734						PLG	-0,22107	0,679937
Decanoylcarnitine_uM_	-0,23647	0,74919						IGHV3_7	-0,22088	0,679127
L_tryptophan	-0,23478	0,741458						FN1	-0,21835	0,668047
L_serine	-0,23463	0,740741						ATRN	-0,21757	0,664683
x1_4_beta_D_Xylan_uM_	-0,23294	0,73304						L_cysteine_uM_	-0,21723	0,66318
GPX3	-0,22968	0,718285						PLTP	-0,21577	0,656887
IGKV1_33	-0,22946	0,717287						IGHV3_43	-0,21318	0,645757
gamma_L_Glutamyl_D_alanine_uM_	-0,22849	0,712915						KRT5	-0,21318	0,645757
Anthranilate	-0,22635	0,703313						KHSRP	-0,21318	0,645757
L_histidine	-0,22558	0,699883						UBR4	-0,21318	0,645757
Guanidinoacetate_uM_	-0,22558	0,699883						FLG2	-0,21318	0,645757
Dodecanedioylcarnitine_uM_	-0,22129	0,680894						NFIB	-0,21318	0,645757
STOM	-0,22063	0,678008						C7	-0,21314	0,645565
L_Homocysteine_uM_	-0,21868	0,669505						Guanine	-0,21248	0,642751
Thiocysteine	-0,21414	0,649868						CLEC3B	-0,21175	0,639615
Guanine	-0,21239	0,64237						Succinate_uM_	-0,21141	0,638197
IGFALS	-0,20826	0,624849						DecanoicAcid_caprate__uM_	-0,20851	0,625875
Taurine_uM_	-0,20687	0,618993						D_Glucose	-0,2082	0,624574
SLK	-0,20461	0,609542						FETUB	-0,20805	0,623953
MASP2	-0,20381	0,606214						SLC4A1	-0,20613	0,61588
Hexanoylcarnitine_uM_	-0,20074	0,593494						LRIG1	-0,20551	0,613305
PLG	-0,19874	0,585311						HTT	-0,20411	0,607444
VCL	-0,19825	0,583326						HEATR1	-0,20101	0,594637
x5_Oxoproline_uM_	-0,19767	0,580937						HexanoicAcid_caproate__uM_	-0,2004	0,592099
ATRN	-0,19634	0,575543						LPA	-0,20012	0,59098
Octenoylcarnitine_uM_	-0,19629	0,575331						L_leucine_uM_	-0,1978	0,58145
Fumarate_uM_	-0,19082	0,553323						PF4	-0,19608	0,574466
L_glutamine	-0,18954	0,548244						HexadecanoicAcid_uM_	-0,19489	0,569651
BCHE	-0,1867	0,536988						L_lysine_uM_	-0,19458	0,568427
KRT14	-0,18646	0,536047						x_5_L_Glutamyl__L_glutamine_uM_	-0,19428	0,567191
APOA2	-0,18554	0,532436						KLKB1	-0,19347	0,563933
DodecanoicAcid_uM_	-0,1851	0,530708						HydroxydodecanoylCarnitine_uM_	-0,19214	0,558588
HydroxydecanoylCarnitine_uM_	-0,1828	0,521751						FLNA	-0,19082	0,553323
Indole_3_acetaldehyde	-0,18249	0,520554						A2M	-0,18865	0,544698
Trp_Kyn	-0,18065	0,513442						IGHV1_24	-0,18842	0,543801
Citrate_uM_	-0,17942	0,508708						Thymidine	-0,18617	0,53493
L_Citrulline	-0,17927	0,50812						BCHE	-0,18608	0,534587
ADAM28	-0,17903	0,507226						IGFALS	-0,18538	0,531845
MYO5A	-0,17809	0,50361						APCS	-0,18476	0,529413
YTHDC2	-0,17809	0,50361						Ascorbate_uM_	-0,18434	0,527741
IKBKE	-0,17809	0,50361						O_tetradecanoyl_L_carnitine_acyl_C14_	-0,18357	0,524765
DYNC1H1	-0,17809	0,50361						BTD	-0,18169	0,517441
FBXW10	-0,17809	0,50361						SERPING1	-0,1803	0,512098
Tetrahydrofolate	-0,17806	0,503513						L_Citrulline	-0,17944	0,508792
Ascorbate_uM_	-0,17743	0,501083						KRT14	-0,179	0,507114
TetradecanoicAcid_uM_	-0,17727	0,500492						COMP	-0,17865	0,505748
Succinate_uM_	-0,17635	0,496986						IGHV4_39	-0,17765	0,501938
NonanoicAcid_pelargonate__uM_	-0,17191	0,480211						PRMT5	-0,17765	0,501938
L_methionine	-0,17037	0,474476						TMEM25	-0,17765	0,501938
Var5	-0,16669	0,460836						RRAGA	-0,17765	0,501938
L_tyrosine_uM_	-0,16547	0,456329						STARD5	-0,17701	0,499475
Pyruvate_uM_	-0,16393	0,450715						IGKV1_13	-0,17697	0,499325
LPA	-0,16215	0,444241						C1S	-0,1733	0,485439
HydroxytetradecanoylCarnitine_uM_	-0,16148	0,441796						Decanoylcarnitine_uM_	-0,17317	0,484935
acyl_C4_OH_Hydroxybutyrylcarnitine_	-0,16087	0,439579						SHBG	-0,17237	0,481934
N_Glycoloyl_neuraminate	-0,16071	0,43903						ALDOB	-0,16687	0,461502
IGHM	-0,16056	0,438481						HRG	-0,16428	0,451979
DodecanedioicAcid_uM_	-0,15995	0,43627						MMP2	-0,16336	0,448623
IGKV1_17	-0,15994	0,436258						L_methionine	-0,16322	0,448135
TTR	-0,15892	0,432585						PFN1	-0,16104	0,440189
L_threonine	-0,15841	0,430755						L_tyrosine	-0,16032	0,437612
L_Homoserine	-0,15841	0,430755						L_Citrulline_uM_	-0,16001	0,436507
O_tetradecanoyl_L_carnitine_acyl_C14_	-0,15642	0,423647						CP	-0,15802	0,429364
IGKV1_13	-0,15168	0,406913						x1_4_beta_D_Xylan	-0,15634	0,423371
Butyrylcarnitine_uM_	-0,14844	0,395655						x2_Hydroxyglutarate_uM_	-0,15573	0,421189
IGHG4	-0,148	0,394103						OctadecanoicAcid_uM_	-0,15343	0,413075
L_asparagine	-0,1466	0,389297						Hydroxypropionylcarnitine_uM_	-0,15298	0,411459
FLNA	-0,14646	0,388787						PON1	-0,1527	0,410497
IGHV6_1	-0,14641	0,388627						DDT	-0,15201	0,408079
BTD	-0,14557	0,385736						L_threonine	-0,15099	0,404493
PFN1	-0,14362	0,379073						L_Homoserine	-0,15099	0,404493
Lactate_uM_	-0,14277	0,376193						L_proline_uM_	-0,15099	0,404493
PRR30	-0,14247	0,375182						A1BG	-0,14944	0,399092
STIL	-0,14247	0,375182						TMC8	-0,14816	0,394652
BCL9L	-0,14247	0,375182						IGHV2_26	-0,14753	0,392481
CNOT2	-0,14247	0,375182						PGLYRP2	-0,1465	0,388936
PI16	-0,14247	0,375182						IGKV1_17	-0,14582	0,386623
SELENOP	-0,13955	0,365301						CFH	-0,14581	0,38656
PRG4	-0,13886	0,363021						C8A	-0,14524	0,384618
APOC1	-0,13763	0,358903						Phosphocreatine	-0,14456	0,382297
IGHV3_23	-0,13755	0,358625						HeptanoicAcid_uM_	-0,14441	0,381774
Pimelylcarnitine_uM_	-0,13618	0,354057						F11	-0,14232	0,374677
Guanidinoacetate	-0,13388	0,34645						CFL1	-0,14217	0,374163
Hydroxypropionylcarnitine_uM_	-0,13372	0,345949						ARHGEF15	-0,14212	0,373999
PicolinicAcid	-0,13342	0,344938						POLQ	-0,14212	0,373999
CFP	-0,13331	0,344602						PHLDB1	-0,14212	0,373999
Var218	-0,1323	0,341264						SDK1	-0,14212	0,373999
TMC8	-0,1273	0,325056						SYCP2	-0,14212	0,373999
CFL1	-0,12717	0,324634						TACC3	-0,14212	0,373999
AHSG	-0,12578	0,320163						NCDN	-0,14212	0,373999
x5_Hydroxyisourate	-0,12498	0,31762						APOC1	-0,14115	0,370713
RBP4	-0,1223	0,309087						MASP1	-0,14085	0,369684
HydroxyoctanoylCarnitine_uM_	-0,12099	0,304983						IGKV1_6	-0,14026	0,367715
Var219	-0,12033	0,30291						F10	-0,13991	0,366542
D_Glucose_uM_	-0,12023	0,30257						YWHAZ	-0,13971	0,365855
D_Rhamnose	-0,12007	0,302091						KNG1	-0,13902	0,363542
L_Citrulline_uM_	-0,11931	0,299694						PZP	-0,13585	0,352979
IGKV1_6	-0,11804	0,295738						Pimelylcarnitine_uM_	-0,13523	0,350918
Uracil	-0,11563	0,288252						L_tryptophan	-0,13447	0,348393
Tetradecanoylcarnitine_uM_	-0,11563	0,288252						OctanoicAcid_caprylate__uM_	-0,13385	0,346373
IGHV2_5	-0,11452	0,284849						EicosapentaenoicAcid_uM_	-0,13294	0,343356
Valerylcarnitine_uM_	-0,11394	0,283062						x_5Z_8Z_11Z_14Z_17Z__IcosapentaenoicAcid_uM_	-0,13294	0,343356
x1_4_beta_D_Xylan	-0,11256	0,278841						SAA4	-0,13291	0,343289
APOF	-0,11128	0,27493						F9	-0,13177	0,339533
YWHAZ	-0,10963	0,269945						KRT10	-0,13151	0,338699
IGHV3_72	-0,10705	0,262187						L_histidine	-0,13141	0,338358
IGHV4_39	-0,10685	0,2616						NDUFV1	-0,13032	0,334823
PRMT5	-0,10685	0,2616						IGLV3_27	-0,12952	0,33222
TMEM25	-0,10685	0,2616						gamma_L_Glutamyl_D_alanine_uM_	-0,12942	0,331884
RRAGA	-0,10685	0,2616						Taurine_uM_	-0,12804	0,327431
IGHV7_4_1	-0,10471	0,255199						KRT2	-0,12761	0,32604
L_lysine_uM_	-0,10397	0,253031						C4BPA	-0,12677	0,323343
LRIG1	-0,10376	0,25241						C8G	-0,12639	0,322119
HTT	-0,10231	0,248113						IGHV3_23	-0,1257	0,319918
CORO1A	-0,10231	0,248113						C8B	-0,123	0,311313
L_Carnitine_uM_	-0,10183	0,2467						FCN2	-0,1192	0,299365
ECM1	-0,10041	0,242558						Propionylcarnitine_uM_	-0,11901	0,298778
L_proline_uM_	-0,09891	0,238192						TetradecanoicAcid_uM_	-0,11871	0,297819
gamma_L_Glutamyl_D_alanine	-0,09845	0,236857						FCGBP	-0,11854	0,297285
APOA4	-0,09725	0,233372						Cys_Gly	-0,11779	0,294958
Methylglutarylcarnitine_uM_	-0,09677	0,231984						IGHG4	-0,11717	0,293043
APOL1	-0,09475	0,226214						L_valine_uM_	-0,11641	0,290688
FN1	-0,09249	0,219769						RBP4	-0,11587	0,289012
D_Glucose	-0,09216	0,218841						Dodecanedioylcarnitine_uM_	-0,1158	0,2888
FETUB	-0,09018	0,213234						C4BPB	-0,11545	0,287712
IGKV2_24	-0,08831	0,208008						ADAM28	-0,11481	0,285737
IGHV1_24	-0,08787	0,206762						CORO1A	-0,11481	0,285737
MST1	-0,08544	0,200026						Hexanoylcarnitine_uM_	-0,11458	0,285025
Indole_3_acetate	-0,08358	0,1949						Tetradecanoylcarnitine_uM_	-0,11412	0,283613
L_tyrosine	-0,08342	0,194479						DecanoicAcid_capricAcid_	-0,11366	0,282205
Indole	-0,08281	0,192803						L_Homocysteine_uM_	-0,11167	0,276134
Octanoylcarnitine_uM_	-0,0825	0,191965						Phosphoserine	-0,11121	0,274742
ALB	-0,08189	0,190292						Anthranilate	-0,11045	0,272418
D_Glyceraldehyde3_phosphate_GlyceronePhosphate_uM_	-0,08097	0,187789						IGHV3_15	-0,10925	0,268806
KRT2	-0,08026	0,185859						Trp_Kyn	-0,10922	0,268718
L_serine_uM_	-0,07867	0,18157						Butyrylcarnitine_uM_	-0,10831	0,265953
IGHV3_15	-0,07841	0,180864						L_serine	-0,108	0,26504
dCMP	-0,07744	0,178277						IGLC2	-0,10757	0,263755
F11	-0,07711	0,177381						GPATCH1	-0,10659	0,260815
glycine_uM_	-0,07698	0,177041						ATP6V1C1	-0,10659	0,260815
ACTA1	-0,0748	0,171218						PRR14L	-0,10659	0,260815
L_phenylalanine_uM_	-0,07346	0,167676						XIRP1	-0,10659	0,260815
Phosphoserine	-0,07192	0,163638						CEP164	-0,10659	0,260815
Allantoate	-0,07146	0,162437						TBC1D9B	-0,10659	0,260815
LUM	-0,07135	0,162147						SMG6	-0,10659	0,260815
ARHGEF15	-0,07124	0,161844						SFTPB	-0,10569	0,258132
POLQ	-0,07124	0,161844						CD14	-0,10469	0,255167
PHLDB1	-0,07124	0,161844						Uracil	-0,10372	0,252278
SDK1	-0,07124	0,161844						CFHR3	-0,10303	0,250241
SYCP2	-0,07124	0,161844						IGLC3	-0,10279	0,249546
TACC3	-0,07124	0,161844						B2M	-0,10128	0,245101
NCDN	-0,07124	0,161844						MINPP1	-0,09981	0,240793
x_5_L_Glutamyl__L_glutamine	-0,06978	0,158034						Var550	-0,09928	0,239268
IGHV3_48	-0,06801	0,153465						Var218	-0,09865	0,237419
Ornithine_uM_	-0,06579	0,14774						L_Carnitine_uM_	-0,09852	0,237044
x5_6_Dihydrothymine	-0,06487	0,14539						AFM	-0,09827	0,236332
KNG1	-0,06312	0,140952						Indole_3_acetaldehyde	-0,09821	0,23616
L_alanine_uM_	-0,06119	0,136065						Ornithine_uM_	-0,09683	0,232184
L_glutamine_uM_	-0,06027	0,133754						APOH	-0,09586	0,229384
Tiglylcarnitine_uM_	-0,05996	0,132986						GSN	-0,09549	0,228317
TetradecenoicAcid_uM_	-0,05996	0,132986						TNC	-0,09535	0,22792
SELL	-0,05595	0,123038						LRG1	-0,09475	0,226199
L_asparagine_uM_	-0,05521	0,121203						C9	-0,09462	0,225819
IGHV3_7	-0,05453	0,119535						IGHV3_53	-0,09373	0,223284
IGKC	-0,05446	0,119364						C5	-0,09235	0,219366
Phosphocreatine	-0,05321	0,116327						x3_Sulfocatechol	-0,09194	0,218202
DecanoicAcid_caprate__uM_	-0,05229	0,114085						Guanidinoacetate_uM_	-0,09194	0,218202
NFE2L2	-0,05115	0,111326						GGH	-0,09103	0,21564
FCN3	-0,05061	0,11001						Allantoate	-0,09026	0,213454
L_leucine_uM_	-0,05015	0,108898						Maltose_Sucrose_uM_	-0,09026	0,213454
PRTN3	-0,04889	0,105883						IGHV3_21	-0,08795	0,206985
SERPINC1	-0,0472	0,101845						Oxaloacetate_uM_	-0,0872	0,204899
L_alanine	-0,04662	0,100469						SELENOP	-0,0869	0,204071
L_MethionineS_oxide	-0,04524	0,097203						CPB2	-0,08514	0,199207
ITIH2	-0,04465	0,095826						IGHV3_9	-0,08513	0,199173
QSOX1	-0,0446	0,095696						IGHV2_5	-0,08501	0,198836
IGLV3_10	-0,04439	0,095203						IGHV1_2	-0,08455	0,197562
PKM	-0,04282	0,091515						x5_6_Dihydrothymine	-0,08154	0,189324
CEP162	-0,04243	0,090626						EicosatetraenoicAcid_uM_	-0,08062	0,186833
Inosine	-0,04095	0,087162						AZGP1	-0,0793	0,183255
OctadecenoicAcid_uM_	-0,04095	0,087162						COL1A2	-0,07862	0,181431
IGHV1_18	-0,03928	0,083304						L_histidine_uM_	-0,07817	0,180226
C7	-0,03776	0,079824						Pantetheine	-0,0781	0,180035
gamma_Glutamyl_Se_methylselenocysteine	-0,0368	0,077643						ITIH2	-0,07807	0,179943
HeptanoicAcid	-0,03619	0,076248						APOC3	-0,07798	0,179707
Taurine	-0,03604	0,075902						F13A1	-0,07713	0,17744
GPATCH1	-0,03562	0,074951						CMYA5	-0,0761	0,174691
ATP6V1C1	-0,03562	0,074951						IGLV3_9	-0,07535	0,172676
PRR14L	-0,03562	0,074951						CEP162	-0,07408	0,169315
XIRP1	-0,03562	0,074951						APOD	-0,07281	0,165961
CEP164	-0,03562	0,074951						IGKV1_16	-0,07161	0,162816
TBC1D9B	-0,03562	0,074951						MYO5A	-0,07106	0,161384
SMG6	-0,03562	0,074951						YTHDC2	-0,07106	0,161384
HRG	-0,03463	0,072702						IKBKE	-0,07106	0,161384
Hexenoylcarnitine_uM_	-0,03236	0,067602						DYNC1H1	-0,07106	0,161384
IGLV2_11	-0,032	0,066801						FBXW10	-0,07106	0,161384
APCS	-0,03033	0,063089						Lactate_uM_	-0,07083	0,160773
L_histidine_uM_	-0,03021	0,062823						IGLV3_19	-0,0708	0,160704
IGLV3_9	-0,02871	0,059503						PicolinicAcid	-0,06945	0,157191
COL12A1	-0,02848	0,059001						acyl_C4_OH_Hydroxybutyrylcarnitine_	-0,0693	0,156792
IGHV3_9	-0,0284	0,058812						NonanoicAcid_pelargonate__uM_	-0,06899	0,155995
KRT10	-0,02787	0,057664						Octenoylcarnitine_uM_	-0,06884	0,155604
TNC	-0,02738	0,05659						Pyruvate_uM_	-0,06654	0,149679
AHNAK	-0,02558	0,05265						GC	-0,06505	0,145852
HexanoicAcid_caproate_	-0,02392	0,049066						ARHGAP21	-0,06427	0,143876
UTP20	-0,02331	0,04774						NFE2L2	-0,06378	0,142631
HGFAC	-0,02234	0,045671						PROS1	-0,06342	0,141703
C1QA	-0,02148	0,043808						HSPA5	-0,06307	0,140808
SFTPB	-0,02119	0,043203						L_glutamine	-0,06272	0,139932
NACA	-0,01918	0,038935						N_Glycoloyl_neuraminate	-0,06272	0,139932
Creatinine	-0,0181	0,036642						PKM	-0,06183	0,137684
IGHV3_49	-0,01776	0,035943						gamma_Glutamyl_Se_methylselenocysteine	-0,0618	0,137612
C1R	-0,01735	0,035071						C1QA	-0,06166	0,137243
IGLC3	-0,01665	0,033605						C1RL	-0,06152	0,136891
Oxaloacetate_uM_	-0,01534	0,030864						CFP	-0,06003	0,133152
APOC4	-0,01151	0,022963						F13B	-0,0584	0,129081
IGLV3_27	-0,01129	0,022519						HERC2	-0,05814	0,12845
CMYA5	-0,0111	0,022121						DodecanoicAcid_uM_	-0,05798	0,128042
Cys_Gly	-0,01074	0,021386						IGFBP3	-0,05641	0,124169
FCGBP	-0,00821	0,016261						APOC4	-0,05611	0,123418
APOA1	-0,00798	0,015792						IGKV2_40	-0,0557	0,122421
Ornithine	-0,00751	0,014861						HydroxytetradecanoylCarnitine_uM_	-0,05461	0,119741
F10	-0,00629	0,012401						CFB	-0,05405	0,118359
IGLC2	-0,00384	0,007522						IGHV1_69	-0,05398	0,118182
SAA4	-0,00231	0,004518						glycine_uM_	-0,05385	0,117874
L_lysine	-0,00199	0,003896						L_MethionineS_oxide	-0,05308	0,116004
IGKV1_16	-0,0013	0,002539						LGALS3BP	-0,05167	0,112568
HexadecanoicAcid_palmiticAcid_	-0,00046	0,000896						L_lysine	-0,05155	0,112293
N_Acetylornithine	-0,00015	0,0003						OctadecatrienoicAcid_uM_	-0,05002	0,108602
GPLD1	-0,0000769	0,000148						Indole	-0,04926	0,106765
MUC16	0	0						TTR	-0,04897	0,106066
PKHD1	0	0						VWF	-0,04852	0,105003
SPEF2	0	0						IGLV1_40	-0,04808	0,103948
SFTPD	0	0						propionyl_carnitine_acyl_C3_	-0,04773	0,10311
KATNAL2	0	0						C3	-0,04727	0,102016
TMEM143	0	0						EicosapentaenoicAcid	-0,0462	0,099474
MEGF11	0	0						ACTA1	-0,04549	0,09779
VCAM1	0	0						IGLC7	-0,04426	0,09489
F13B	0,000385	0,000748						OctadecadienoicAcid_uM_	-0,04329	0,092632
SHBG	0,000693	0,001348						CPN2	-0,04226	0,090225
IGHV3_74	0,00131	0,002557						IGHG3	-0,04193	0,089456
SERPIND1	0,001381	0,002697						C4A	-0,04177	0,089082
Var156	0,002246	0,004391						L_alanine_uM_	-0,04054	0,086223
HydroxyisovaleroylCarnitine_uM_	0,003067	0,006004						acyl_C5_1_Tiglylcarnitine_	-0,03993	0,084806
GAPDH	0,003299	0,006462						HexanoicAcid_caproate_	-0,03947	0,083746
EicosatetraenoicAcid_uM_	0,003527	0,006912						FBLN1	-0,03935	0,083478
Propionylcarnitine_uM_	0,004294	0,008433						Var105	-0,03801	0,080399
INHBC	0,004511	0,008863						GPLD1	-0,03677	0,07756
acyl_C5_1_Tiglylcarnitine_	0,005061	0,009954						MUC16	-0,03553	0,07475
octenoyl_l_carnitine_acyl_C8_1_	0,006287	0,012401						PKHD1	-0,03553	0,07475
Sphinganine1_phosphate	0,010735	0,021386						SFTPD	-0,03553	0,07475
Pantetheine	0,010812	0,021541						KATNAL2	-0,03553	0,07475
PZP	0,0128	0,025617						TMEM143	-0,03553	0,07475
Var14	0,014265	0,028641						MEGF11	-0,03553	0,07475
SNTG1	0,014286	0,028682						VCAM1	-0,03553	0,07475
propionyl_carnitine_acyl_C3_	0,015028	0,030225						DodecanedioicAcid_uM_	-0,03503	0,073622
gamma_L_Glutamylputrescine	0,015642	0,031498						octenoyl_l_carnitine_acyl_C8_1_	-0,03411	0,071548
JCHAIN	0,01701	0,034361						IGHV6_1	-0,03363	0,070464
IGHV3_53	0,018823	0,038176						UTP20	-0,03338	0,069892
CP	0,020089	0,040858						INHBC	-0,03188	0,066533
F9	0,020476	0,04168						APOA4	-0,03137	0,065396
B2M	0,02175	0,044399						C4B	-0,03137	0,06539
OctanoicAcid_caprylate__uM_	0,021929	0,044779						C1QC	-0,03084	0,064226
FTL	0,022437	0,045868						ITIH4	-0,03075	0,064019
CFH	0,0227	0,046434						Glutathione_uM_	-0,02891	0,059952
IGKV2_40	0,023039	0,047159						ITIH3	-0,02862	0,059319
NDUFV1	0,024249	0,049771						IGHV3_20	-0,02696	0,05566
IGLL1	0,024813	0,050991						HydroxydecanoylCarnitine_uM_	-0,02662	0,054916
FCMR	0,024813	0,050991						x2_Oxoglutarate_uM_	-0,02601	0,053582
DocosapentaenoicAcid__7Z_10Z_13Z_16Z_19Z__Docosa_7_10_13_16_19_	0,024843	0,051054						Inosine	-0,02249	0,045975
APMAP	0,025228	0,05189						L_asparagine	-0,02203	0,044991
MRC1	0,026316	0,054261						L_leucine	-0,02004	0,040753
ICAM1	0,026316	0,054261						Octanoylcarnitine_uM_	-0,01989	0,040429
CFD	0,026775	0,055261						IGHV1_69_2	-0,01906	0,038674
Maltose	0,029444	0,061125						IGHV3_49	-0,01898	0,038498
CNDP1	0,029962	0,062272						GAPDH	-0,01872	0,037953
Maltose_Sucrose_uM_	0,030364	0,063165						LCAT	-0,01829	0,037044
x2_Hydroxyglutarate_Citramalate	0,033584	0,070356						Var35	-0,01791	0,036245
DST	0,035618	0,074951						D_Rhamnose	-0,01759	0,03558
VSIG4	0,035618	0,074951						Mannitol	-0,01744	0,03526
CTSD	0,035618	0,074951						SERPINC1	-0,01707	0,034493
ARHGAP5	0,035618	0,074951						OctadecenoicAcid_uM_	-0,01698	0,034295
IGKV6_21	0,035618	0,074951						IGHV4_30_4	-0,01689	0,034117
UGT1A4	0,035618	0,074951						IGHG2	-0,01545	0,031106
COL3A1	0,035618	0,074951						Tiglylcarnitine_uM_	-0,01453	0,029193
FRAS1	0,035618	0,074951						CPN1	-0,01356	0,027191
ADAMTS16	0,035618	0,074951						HydroxyisovaleroylCarnitine_uM_	-0,01346	0,026978
KIAA1217	0,035618	0,074951						Valerylcarnitine_uM_	-0,01331	0,026664
NID1	0,035618	0,074951						APOE	-0,01324	0,026526
IFT172	0,035618	0,074951						SPEF2	-0,01276	0,025525
CD163	0,035618	0,074951						CFHR1	-0,01227	0,024522
ITIH1	0,035676	0,07508						IGLV2_18	-0,01219	0,024357
IGFBP3	0,036871	0,077794						LCN2	-0,0121	0,024178
APOC3	0,037149	0,078433						SERPIND1	-0,0121	0,024169
IGLV2_18	0,037407	0,079021						HPX	-0,01209	0,024155
SERPINA6	0,037599	0,079459						SNTG1	-0,012	0,023976
IGLV2_8	0,037823	0,079971						L_aspartate	-0,01132	0,022578
HBA1	0,040497	0,086128						IGLV3_10	-0,01121	0,02235
ALDOB	0,044527	0,095528						FGB	-0,01109	0,022112
EicosapentaenoicAcid_uM_	0,044932	0,096481						SAA1	-0,00985	0,019583
x_5Z_8Z_11Z_14Z_17Z__IcosapentaenoicAcid_uM_	0,044932	0,096481						CD44	-0,00888	0,01762
PRDX2	0,04508	0,096829						HECTD4	-0,00888	0,01762
C1RL	0,045654	0,098182						EMSY	-0,00888	0,01762
CPN1	0,046696	0,100656						PRUNE2	-0,00888	0,01762
C8G	0,047052	0,101494						Methylglutarylcarnitine_uM_	-0,00841	0,016676
C4BPB	0,047157	0,101747						SAA2	-0,00809	0,016027
HexadecenoicAcid_uM_	0,047232	0,101928						IGLV6_57	-0,00746	0,014758
A1BG	0,047481	0,102516						KRT9	-0,00682	0,013466
IGKV1_8	0,047616	0,10284						AHSG	-0,00566	0,011151
PROZ	0,047873	0,103452						IGKC	-0,00536	0,010541
Mannitol	0,048152	0,104119						COL1A1	-0,00357	0,007005
C8A	0,048584	0,105152						Hexenoylcarnitine_uM_	-0,00321	0,006295
MMP2	0,048923	0,105961						LDHB	-0,00308	0,006026
C1S	0,049264	0,106777						IGLV1_47	-0,0027	0,005274
SERPINF2	0,049532	0,107421						Var219	-0,00246	0,004821
L_valine_uM_	0,049533	0,107421						L_serine_uM_	-0,00229	0,004488
C4A	0,050618	0,110032						F2	-0,00207	0,004036
FCN2	0,050991	0,110934						HeptanoicAcid	-0,00061	0,001192
GCN1	0,051153	0,111326						Mannitol_Sorbitol_uM_	0	0
COL4A4	0,051153	0,111326						AHNAK	0	0
Var550	0,051373	0,11186						Citrate_uM_	0,000306	0,000595
HERC2	0,052524	0,11465						trans_4_Hydroxy_L_proline	0,001989	0,003887
Glutathione	0,052818	0,115363						GP1BA	0,003283	0,006432
C1QC	0,052915	0,115601						Taurine	0,005354	0,010537
OctadecanoicAcid_stearicAcid_	0,05306	0,115953						CAT	0,00606	0,011945
Var35	0,053548	0,11714						x5_Oxoproline_uM_	0,006578	0,012982
IGHV2_26	0,054171	0,118661						ITIH1	0,006659	0,013143
OctadecadienoicAcid_uM_	0,05444	0,119324						HABP2	0,007402	0,014636
APOH	0,054989	0,120669						COL12A1	0,007823	0,015482
ADIPOQ	0,0552	0,121185						PRDX2	0,008067	0,015977
D_Ribose_uM_	0,055973	0,12309						VTN	0,010963	0,021851
L_phenylalanine	0,056127	0,123465						CETP	0,011749	0,023457
SERPING1	0,056464	0,124296						IGHM	0,011779	0,023517
C8B	0,057233	0,126197						COL4A4	0,012757	0,025525
butanoyl_l_carnitine_acyl_C4_	0,057507	0,126877						IGLV2_11	0,013656	0,027381
C4B	0,057516	0,1269						TFRC	0,014289	0,028687
LCN2	0,057724	0,127418						FTL	0,014921	0,030002
TLN1	0,058708	0,12986						Ornithine	0,015756	0,031741
TetradecanoicAcid_myristicAcid_	0,059194	0,131074						N_Acetylneuraminate	0,016674	0,033656
LGALS3BP	0,061798	0,1376						PRR30	0,017765	0,035943
DodecanedioicAcid	0,061954	0,138						STIL	0,017765	0,035943
Sphingosine1_phosphate	0,062107	0,138382						BCL9L	0,017765	0,035943
IGKV2_30	0,062312	0,138902						CNOT2	0,017765	0,035943
MYH9	0,062505	0,139387						PI16	0,017765	0,035943
DDT	0,064408	0,14422						DocosahexaenoicAcid_uM_	0,019128	0,038821
Succinate	0,064561	0,144608						SERPINA1	0,019275	0,03913
ARHGAP21	0,065586	0,147227						x5_Hydroxyisourate	0,02004	0,040753
Mannitol_Sorbitol_uM_	0,065941	0,148137						APMAP	0,021294	0,043423
IGHG2	0,066411	0,149342						HexadecenoicAcid_uM_	0,021417	0,043683
MASP1	0,066782	0,150292						IGLV2_8	0,022693	0,046419
IGHV3_30_3	0,067167	0,151281						PIGR	0,023387	0,04791
x2_Oxoglutarate_uM_	0,068395	0,154449						D_Glyceraldehyde3_phosphate_GlyceronePhosphate_uM_	0,023558	0,048279
CPB2	0,068497	0,154716						Guanidinoacetate	0,023711	0,048609
CETP	0,070205	0,159154						L_phenylalanine	0,02417	0,049601
IGLC7	0,070379	0,159605						SERPINA10	0,024612	0,050556
ERN1	0,071236	0,161844						L_glutamate_uM_	0,0257	0,052919
NIPBL	0,071236	0,161844						x_8Z_11Z_14Z__IcosatrienoicAcid_uM_	0,028606	0,059279
DNAH1	0,071236	0,161844						Var156	0,029283	0,06077
BCL9	0,071236	0,161844						PRKDC	0,031892	0,066563
USP8	0,071236	0,161844						APOL1	0,03412	0,071563
L_leucine	0,072229	0,164443						FGG	0,034813	0,073123
F2	0,074964	0,171662						DocosapentaenoicAcid__7Z_10Z_13Z_16Z_19Z__Docosa_7_10_13_16_19_	0,034878	0,073272
CD5L	0,076008	0,174444						IGLL1	0,035628	0,074972
B4GALT1	0,076729	0,176363						FCMR	0,035628	0,074972
IGKV3_20	0,07736	0,178054						HBA1	0,035654	0,075028
Acetylcarnitine_uM_	0,077443	0,178277						IGLV1_36	0,036283	0,076461
REG3A	0,078949	0,182322						CFHR5	0,036548	0,077062
TTN	0,079801	0,184622						gamma_L_Glutamylputrescine	0,037326	0,078834
Var105	0,081893	0,190299						L_glutamine_uM_	0,039315	0,083393
IGLV3_1	0,08192	0,190373						CFD	0,039373	0,08353
NonanoicAcid_pelargonicAcid_	0,083423	0,194479						SELL	0,039946	0,084854
IGKV1_27	0,084824	0,198329						IGKV3_11	0,040565	0,086281
L_Carnitine	0,085264	0,199544						MRC1	0,040878	0,087008
FBLN1	0,086505	0,202975						ICAM1	0,040878	0,087008
x2_3_Phospho_D_glycerate_uM_	0,090017	0,21278						TTN	0,041792	0,08913
KRT9	0,090386	0,213817						CLU	0,041999	0,08961
IGHV4_4	0,09059	0,214393						IGHV3_64	0,045175	0,097051
L_proline	0,090938	0,215376						Malate_uM_	0,045434	0,097665
Citrate	0,090938	0,215376						S_Adenosyl_L_methionine	0,045483	0,097779
HSPA5	0,091464	0,216861						CFHR2	0,045851	0,098651
CPN2	0,092282	0,219172						ADIPOQ	0,045926	0,098825
IGHG3	0,093427	0,222421						IGHV3_30	0,047319	0,102131
C4BPA	0,09533	0,227862						Var14	0,047433	0,102406
IGLV3_19	0,095752	0,229067						NEK4	0,047621	0,102851
PRDX6	0,098244	0,236258						Tetrahydrofolate	0,04779	0,103253
PPBP	0,098588	0,237254						SERPINA3	0,048956	0,106039
Oxaloacetate	0,099679	0,240423						Maltose	0,049564	0,107499
PROS1	0,10063	0,243204						IGHV3_48	0,049741	0,107922
GP1BA	0,10148	0,245698						butanoyl_l_carnitine_acyl_C4_	0,050329	0,109339
IGKV6D_21	0,1025	0,248675						KRT1	0,050903	0,110721
IGKV3D_20	0,10314	0,250565						Indoxyl	0,052318	0,114147
IGHV1_2	0,10322	0,25082						x_7Z_10Z_13Z_16Z_19Z__Docosa_7_10_13_16_19_pentaenoicAcid_uM_	0,05258	0,114786
HPX	0,10417	0,253599						JCHAIN	0,052595	0,11482
D_Ribose	0,10581	0,258494						MKI67	0,053296	0,116526
L_Arabinose	0,10581	0,258494						CHD5	0,053296	0,116526
DodecanoicAcid_lauricAcid_	0,10612	0,259408						RYR1	0,053296	0,116526
VNN1	0,10685	0,2616						IGLV7_46	0,053296	0,116526
HIST1H2AB	0,10685	0,2616						PRRC2B	0,053296	0,116526
SMC3	0,10685	0,2616						DCAF1	0,053296	0,116526
SPTA1	0,10685	0,2616						CES1	0,053296	0,116526
HSPG2	0,10685	0,2616						SPRY2	0,053296	0,116526
KRT33B	0,10685	0,2616						ORM1	0,055496	0,121915
CEP290	0,10685	0,2616						NACA	0,057406	0,126627
TUBA3C	0,10685	0,2616						COL6A3	0,057406	0,126627
LTA4H	0,10685	0,2616						C6	0,057863	0,127762
CHI3L1	0,10685	0,2616						L_Carnitine	0,058743	0,129947
ANK1	0,10685	0,2616						TetradecenoicAcid_uM_	0,058896	0,130328
KRT75	0,10685	0,2616						sn_glycero_3_Phosphoethanolamine	0,059202	0,131091
KRT36	0,10685	0,2616						FCN3	0,06015	0,133465
KRT31	0,10685	0,2616						x2__3__CyclicCMP	0,061955	0,138
MAP1A	0,10685	0,2616						HexadecanoicAcid_palmiticAcid_	0,063179	0,141096
KRT87P	0,10685	0,2616						B4GALT1	0,063784	0,142631
SPP2	0,10685	0,2616						x6_HydroxykynurenicAcid	0,064721	0,145014
FABP3	0,10685	0,2616						TetradecanoicAcid_myristicAcid_	0,064862	0,145372
ENO1	0,10685	0,2616						L_alanine	0,065474	0,146935
DSP	0,10685	0,2616						HPR	0,066111	0,14857
EPB42	0,10685	0,2616						F12	0,067014	0,150888
GLIPR2	0,10685	0,2616						REG3A	0,06713	0,151189
TRIM33	0,10685	0,2616						x5_Guanidino_2_oxopentanoate	0,067462	0,152045
AMY2B	0,10685	0,2616						CA1	0,068105	0,1537
OLFM4	0,10685	0,2616						ANPEP	0,068797	0,155492
KRT85	0,10685	0,2616						L_proline	0,069604	0,157584
CA3	0,10685	0,2616						ORM2	0,070537	0,160019
TUBB	0,10685	0,2616						PROZ	0,071071	0,161409
TPI1	0,10685	0,2616						Indole_3_acetate	0,071134	0,161573
KRT4	0,10685	0,2616						SERPINA7	0,071336	0,162102
ANXA1	0,10685	0,2616						SERPINF2	0,072545	0,165274
C9	0,10943	0,269347						ArachidonicAcid_EicosatetraenoicAcid_	0,073887	0,168815
x5_Guanidino_2_oxopentanoate	0,10995	0,270916						FGL1	0,074242	0,169751
ANPEP	0,11005	0,2712						gamma_L_Glutamyl_D_alanine	0,074958	0,17165
C5	0,11068	0,27311						IGHV4_28	0,076423	0,175549
VTN	0,11151	0,27565						CRP	0,076452	0,175627
IGLV6_57	0,11222	0,277802						VASN	0,077785	0,179194
HIST1H4A	0,11249	0,278635						LBP	0,077932	0,179588
S100A8	0,11263	0,279056						TLN1	0,080663	0,186953
VWF	0,1134	0,281399						HydroxyoctanoylCarnitine_uM_	0,081536	0,189324
IGFBP2	0,1184	0,296863						C1QB	0,082476	0,19189
PTGDS	0,11851	0,297208						D_Ribose_uM_	0,083372	0,194343
IGHV1_69	0,11928	0,299616						HGFAC	0,08722	0,204962
AZGP1	0,12046	0,303312						IGKV3_20	0,087735	0,206398
COL6A3	0,12149	0,306537						x_5_L_Glutamyl__L_glutamine	0,087961	0,207027
acyl_C4_DC	0,12191	0,307885						DST	0,088827	0,209447
LRG1	0,1226	0,310061						VSIG4	0,088827	0,209447
SERPINA10	0,12507	0,317909						CTSD	0,088827	0,209447
AFM	0,12661	0,32284						ARHGAP5	0,088827	0,209447
LCP1	0,12714	0,324542						IGKV6_21	0,088827	0,209447
OctadecatrienoicAcid_uM_	0,12744	0,325479						UGT1A4	0,088827	0,209447
IGLV1_40	0,12931	0,33153						COL3A1	0,088827	0,209447
IGHV3_21	0,12967	0,332706						FRAS1	0,088827	0,209447
LCAT	0,12974	0,332939						ADAMTS16	0,088827	0,209447
GGH	0,13002	0,333847						KIAA1217	0,088827	0,209447
CLU	0,13245	0,341779						NID1	0,088827	0,209447
x5_Hydroxyindoleacetate	0,13265	0,342418						IFT172	0,088827	0,209447
CFB	0,13276	0,342791						CD163	0,088827	0,209447
CD44	0,13357	0,345438						S100A9	0,089633	0,211704
HECTD4	0,13357	0,345438						ECM1	0,090363	0,213753
EMSY	0,13357	0,345438						IGHV3_30_3	0,090453	0,214009
PRUNE2	0,13357	0,345438						IGKV1_27	0,090924	0,215333
D_Glyceraldehyde3_phosphate_GlyceronePhosphate	0,13388	0,34645						ALB	0,091173	0,216039
HPR	0,13408	0,347125						DocosahexaenoicAcid	0,091354	0,216547
F12	0,1359	0,353126						Oxaloacetate	0,091479	0,216904
PIGR	0,13989	0,366471						IGLV3_1	0,091788	0,217771
L_aspartate	0,14078	0,36945						a_LinolenicAcid_OctadecatrienoicAcid_	0,093315	0,222102
COL1A2	0,14297	0,376864						CFI	0,093386	0,222312
NEK4	0,14322	0,377703						Sphingosine1_phosphate	0,093774	0,223415
GC	0,14331	0,378014						D_Glyceraldehyde3_phosphate_GlyceronePhosphate	0,09408	0,224288
EicosapentaenoicAcid	0,14354	0,378803						APOB	0,095763	0,229104
HABP2	0,14424	0,381189						IGLV1_51	0,096048	0,229922
Malate_uM_	0,1443	0,381419						Creatinine	0,096069	0,229981
ITIH4	0,14432	0,38145						IGKV3_15	0,096079	0,23001
Indoxyl	0,14446	0,381941						CST3	0,096768	0,231991
DecanoicAcid_capricAcid_	0,14522	0,384566						MYH9	0,098007	0,23557
L_Homocysteine	0,14614	0,387714						IGKV1_8	0,099401	0,239615
REG1B	0,14713	0,391121						IGHV3_72	0,10247	0,248598
CD14	0,14724	0,391495						IGHV3_74	0,10247	0,24859
IGKV3_11	0,14749	0,392352						IGFBP2	0,1028	0,249569
ITIH3	0,14777	0,393307						ACTB	0,10447	0,254488
C3	0,1486	0,396185						EFEMP1	0,10492	0,255824
Dehydroascorbate_uM_	0,14875	0,396715						PRDX6	0,10537	0,257188
HLA_C	0,14963	0,399746						Folate	0,10549	0,257518
x4_Pyridoxate	0,15074	0,403645						IGHV3_64D	0,10731	0,262982
IGKV1D_8	0,15138	0,405862						CNDP1	0,10754	0,263643
KHDC4	0,15138	0,405862						SERPINF1	0,10823	0,265728
DMAP1	0,15138	0,405862						IGLV3_25	0,10884	0,267558
SMC5	0,15138	0,405862						MAN1A1	0,10975	0,270301
FGB	0,15329	0,412558						HIST1H4A	0,11023	0,271752
MMP9	0,15339	0,412907						IGHV3_13	0,11196	0,277013
MB	0,15339	0,412907						Phosphate	0,11259	0,278932
IGLC6	0,15339	0,412907						x5_Hydroxyindoleacetate	0,11305	0,280337
HIST1H2BB	0,15339	0,412907						IGKV3D_20	0,11468	0,285318
ALDOA	0,15339	0,412907						MPO	0,1148	0,285695
PPIA	0,15339	0,412907						L_valine	0,1155	0,287856
IGLV9_49	0,15339	0,412907						x5_Aminopentanoate	0,1155	0,287856
HBG2	0,15339	0,412907						HBD	0,11615	0,289874
TKT	0,15339	0,412907						x4_Pyridoxate	0,11733	0,293538
CTSG	0,15339	0,412907						IGHV1_46	0,11837	0,296777
SLC2A1	0,15339	0,412907						IGHV4_4	0,11867	0,297699
SERPINB1	0,15346	0,413165						Sphinganine1_phosphate	0,11871	0,297819
CA1	0,15448	0,416767						AGT	0,11906	0,298924
L_glutamate_uM_	0,15458	0,417119						NonanoicAcid_pelargonicAcid_	0,11932	0,299729
APOB	0,15489	0,418198						DEFA3	0,11963	0,300683
CFHR3	0,15505	0,418779						PTGDS	0,12369	0,313489
KRT1	0,15523	0,41944						Succinate	0,12376	0,313721
CEP350	0,15561	0,420777						VNN1	0,12436	0,31563
IGHV4_30_4	0,15642	0,423636						HIST1H2AB	0,12436	0,31563
Phosphate	0,15826	0,430205						SMC3	0,12436	0,31563
N_formylKynurenine	0,16254	0,445668						SPTA1	0,12436	0,31563
D_Hexose_phosphate_uM_	0,16286	0,446809						HSPG2	0,12436	0,31563
TFRC	0,16393	0,450702						KRT33B	0,12436	0,31563
Dehydroascorbate	0,16485	0,454075						CEP290	0,12436	0,31563
DocosahexaenoicAcid_uM_	0,1649	0,45426						TUBA3C	0,12436	0,31563
x_7Z_10Z_13Z_16Z_19Z__Docosa_7_10_13_16_19_pentaenoicAcid_uM_	0,16492	0,454322						LTA4H	0,12436	0,31563
ORM2	0,16637	0,459658						CHI3L1	0,12436	0,31563
DBH	0,16638	0,459696						ANK1	0,12436	0,31563
Fumarate	0,16669	0,460836						KRT75	0,12436	0,31563
VASN	0,16691	0,461653						KRT36	0,12436	0,31563
sn_glycero_3_Phosphoethanolamine	0,16731	0,463101						KRT31	0,12436	0,31563
C1QB	0,16875	0,468419						MAP1A	0,12436	0,31563
x5_Oxoproline	0,1693	0,47048						KRT87P	0,12436	0,31563
ORM1	0,17012	0,473531						SPP2	0,12436	0,31563
SERPINF1	0,17019	0,473777						FABP3	0,12436	0,31563
MINPP1	0,1704	0,474553						ENO1	0,12436	0,31563
HBD	0,17081	0,476124						DSP	0,12436	0,31563
IGLV1_47	0,17159	0,479032						EPB42	0,12436	0,31563
F5	0,17327	0,485319						GLIPR2	0,12436	0,31563
APOE	0,17379	0,487289						TRIM33	0,12436	0,31563
PCYOX1	0,17505	0,49205						AMY2B	0,12436	0,31563
FGG	0,17572	0,494579						OLFM4	0,12436	0,31563
SAA1	0,17635	0,496986						KRT85	0,12436	0,31563
IGHV2_70D	0,17755	0,501552						CA3	0,12436	0,31563
MKI67	0,17809	0,50361						TUBB	0,12436	0,31563
CHD5	0,17809	0,50361						TPI1	0,12436	0,31563
RYR1	0,17809	0,50361						KRT4	0,12436	0,31563
IGLV7_46	0,17809	0,50361						ANXA1	0,12436	0,31563
PRRC2B	0,17809	0,50361						LinoleicAcid__9Z_12Z__OctadecadienoicAcid_	0,12468	0,316638
DCAF1	0,17809	0,50361						Cystathionine	0,12604	0,321008
CES1	0,17809	0,50361						LCP1	0,12683	0,323535
SPRY2	0,17809	0,50361						Dihomo_gamma_linolenicAcid__8Z_11Z_14Z__IcosatrienoicAcid_	0,12758	0,325957
x2S_5S_MethionineSulfoximine	0,17836	0,50465						IGHA1	0,12883	0,329968
ACTB	0,17858	0,505484						KRT83	0,12901	0,330562
IGHV3_30	0,18118	0,515487						APOA1	0,1296	0,332472
CFHR1	0,1814	0,516341						HRNR	0,13043	0,335161
IGHV3_20	0,18352	0,524561						D_Ribose	0,13217	0,340854
CAMP	0,18573	0,533192						L_Arabinose	0,13217	0,340854
x_8Z_11Z_14Z__IcosatrienoicAcid_uM_	0,18632	0,535525						C2	0,1327	0,3426
Glycerol3_phosphate_uM_	0,18636	0,535689						HBB	0,13546	0,351669
AGT	0,18648	0,536152						OctadecanoicAcid_stearicAcid_	0,13554	0,351933
IGLV1_36	0,18937	0,54757						IGKV2_24	0,13611	0,353822
Argininosuccinate	0,18939	0,547631						L_asparagine_uM_	0,13768	0,359052
N_Acetylneuraminate	0,19	0,550074						IGHV1_8	0,13799	0,360095
x2_Oxoglutaramate	0,19031	0,551294						F7	0,13808	0,360394
L_valine	0,19092	0,553727						F5	0,13907	0,363723
x5_Aminopentanoate	0,19092	0,553727						L_Selenomethionine	0,13997	0,366744
Pyruvate	0,19108	0,554349						FGA	0,1432	0,377641
Adenine	0,19138	0,555565						D_Arabitol	0,1441	0,380729
IGHV1_69_2	0,19324	0,562995						x2_Hydroxyglutarate_Citramalate	0,14548	0,38544
TetradecenoicAcid_myristoleicAcid_	0,19338	0,563551						acyl_C5_OH_hydroxyisovalerylcarnitine_	0,14732	0,391752
SERPINA7	0,19467	0,568781						Adenine	0,14777	0,393328
kynurenine	0,19491	0,569731						CD5L	0,15042	0,402502
Formyl_5_hydroxy_kynurenamine	0,19491	0,569731						IGKV1D_8	0,15101	0,404559
SERPINA1	0,19506	0,570361						KHDC4	0,15101	0,404559
CAT	0,1983	0,583493						DMAP1	0,15101	0,404559
FGL1	0,2	0,59049						SMC5	0,15101	0,404559
SAA2	0,20281	0,60206						OctadecenoicAcid_OleicAcid_	0,15145	0,406094
KRT83	0,20301	0,602895						Acetylcarnitine_uM_	0,15252	0,409849
S_Adenosyl_L_methionine	0,20412	0,607514						hexanoyl_L_carnitine_acyl_C6_	0,15405	0,415239
LDHB	0,20453	0,609188						CEP350	0,15647	0,423831
THBS1	0,20487	0,610604						S100A8	0,1571	0,426073
COL1A1	0,20888	0,627456						IGHV2_70D	0,15805	0,42948
TSC22D2	0,21371	0,648011						PRG2	0,15867	0,431693
SPEN	0,21371	0,648011						CAMP	0,15978	0,435677
IGHV5_10_1	0,21371	0,648011						PCYOX1	0,16011	0,436851
COL5A1_AS1	0,21371	0,648011						SERPINA6	0,16068	0,438899
SIPA1L3	0,21371	0,648011						Glutathione	0,16175	0,44277
EIF3B	0,21371	0,648011						Diphosphate	0,16246	0,445353
x6_HydroxykynurenicAcid	0,21376	0,648204						GCN1	0,16584	0,457685
D_Glucose6_phosphate	0,21393	0,648938						x2_Oxoglutaramate	0,16965	0,471778
IGHV3_64D	0,21586	0,657262						Fumarate	0,16996	0,472912
TSKU	0,2162	0,658724						DodecanedioicAcid	0,17439	0,489549
x8_Methoxykynurenate	0,21675	0,661125						D_Hexose_phosphate_uM_	0,17592	0,495352
IGHV3_64	0,21776	0,665506						HP	0,17739	0,500946
HBB	0,21834	0,668006						ERN1	0,17765	0,501938
CFHR5	0,22084	0,678961						NIPBL	0,17765	0,501938
IGKV1_5	0,22126	0,680811						DNAH1	0,17765	0,501938
L_octanoylcarnitine_acyl_C8_	0,22175	0,682919						BCL9	0,17765	0,501938
Folate	0,22219	0,68487						USP8	0,17765	0,501938
hexanoyl_L_carnitine_acyl_C6_	0,22343	0,69037						MMP9	0,17851	0,505233
PRKDC	0,22379	0,691948						MB	0,17851	0,505233
LBP	0,22453	0,695208						IGLC6	0,17851	0,505233
BLVRB	0,22688	0,705688						HIST1H2BB	0,17851	0,505233
SERPINA3	0,22698	0,706129						ALDOA	0,17851	0,505233
Pyridoxal	0,22941	0,717061						PPIA	0,17851	0,505233
x2__3__CyclicCMP	0,2311	0,724689						IGLV9_49	0,17851	0,505233
S100A9	0,23151	0,726513						HBG2	0,17851	0,505233
Glycerol3_phosphate	0,23263	0,731633						TKT	0,17851	0,505233
Cystathionine	0,23302	0,733369						CTSG	0,17851	0,505233
MAN1A1	0,23428	0,739142						SLC2A1	0,17851	0,505233
OctadecenoicAcid_OleicAcid_	0,23585	0,746371						SERPINB1	0,17859	0,505539
IGKV2D_29	0,23604	0,74722						AMBP	0,17915	0,507659
Diphosphate	0,23647	0,74919						IGKV6D_21	0,18566	0,53291
ArachidonicAcid_EicosatetraenoicAcid_	0,23816	0,756987						kynurenine	0,18617	0,53493
trans_4_Hydroxy_L_proline	0,23908	0,761252						Formyl_5_hydroxy_kynurenamine	0,18617	0,53493
DocosahexaenoicAcid	0,23976	0,764446						DodecanoicAcid_lauricAcid_	0,18816	0,542769
IGHA1	0,24095	0,769986						Spermidine	0,19336	0,563488
HP	0,24197	0,774717						DBH	0,19579	0,573294
EFEMP1	0,24258	0,777596						REG1B	0,20026	0,591523
HRNR	0,24282	0,778716						IGKV1_5	0,20059	0,592881
Sedoheptulose7_phosphate_uM_	0,24475	0,787812						HLA_C	0,2015	0,596639
ECPAS	0,24933	0,809612						IGHV1_3	0,20592	0,614984
NSRP1	0,24933	0,809612						x2S_5S_MethionineSulfoximine	0,21051	0,634362
DDX43	0,24933	0,809612						Spermine	0,21219	0,641513
PERM1	0,24933	0,809612						L_octanoylcarnitine_acyl_C8_	0,21233	0,642103
GOLGA6L4	0,24933	0,809612						Argininosuccinate	0,21248	0,642751
IGKV3_15	0,25023	0,81392						TGFBI	0,21263	0,643401
CST3	0,25047	0,815082						TSC22D2	0,21318	0,645757
CA2	0,25062	0,81582						SPEN	0,21318	0,645757
CFI	0,25123	0,818728						IGHV5_10_1	0,21318	0,645757
IGHV1_3	0,25669	0,845241						COL5A1_AS1	0,21318	0,645757
IGHV4_28	0,25728	0,84814						SIPA1L3	0,21318	0,645757
Adenosine	0,25732	0,848385						EIF3B	0,21318	0,645757
DEFA3	0,25791	0,851274						Dimethylglycine	0,2134	0,64668
FGA	0,25857	0,854524						IGKV2_30	0,2137	0,647972
CRP	0,25981	0,860625						acyl_C4_DC	0,21462	0,651948
CFHR2	0,26052	0,864136						L_aspartate_uM_	0,21493	0,653256
MPO	0,26238	0,873382						CNTLN	0,21687	0,661623
PROC	0,26326	0,877817						Pyruvate	0,21723	0,66318
Sedoheptulose7_phosphate	0,26561	0,889545						L_Homocysteine	0,21952	0,673152
F7	0,26824	0,902882						D_Glucose6_phosphate	0,22136	0,681206
TFPI	0,26933	0,908403						Xanthine	0,22181	0,683212
PGLYRP1	0,27049	0,914317						x4_Acetamidobutanoate	0,22457	0,69538
PRG2	0,27113	0,91761						Creatine	0,22594	0,701518
acyl_C5_OH_hydroxyisovalerylcarnitine_	0,27373	0,930961						ELANE	0,22736	0,70781
IGHV3_13	0,2741	0,932892						IGKV2D_29	0,22862	0,713476
Dopamine	0,2745	0,934906						BLVRB	0,22906	0,715456
IGLV1_51	0,27916	0,9592						TSKU	0,22908	0,715569
IGLV3_25	0,28155	0,971795						Adenosine	0,23497	0,742321
NOLC1	0,28494	0,989785						PROC	0,23514	0,74309
BAHCC1	0,28494	0,989785						IGHV3_73	0,23916	0,761653
ITPR3	0,28494	0,989785						x2_3_Phospho_D_glycerate_uM_	0,24185	0,7742
NUP214	0,28494	0,989785						TetradecenoicAcid_myristoleicAcid_	0,24369	0,782832
IGLV8_61	0,28536	0,991996						ECPAS	0,24872	0,806681
D_Arabitol	0,28615	0,996238						NSRP1	0,24872	0,806681
acetyl_carnitine_acyl_C2_	0,29214	1028543						DDX43	0,24872	0,806681
Dihomo_gamma_linolenicAcid__8Z_11Z_14Z__IcosatrienoicAcid_	0,29505	104449						PERM1	0,24872	0,806681
IGHV3_73	0,29542	1046516						GOLGA6L4	0,24872	0,806681
C2	0,29565	1047799						Dopamine	0,25119	0,818528
gamma_Glutamyl_gamma_aminobutyrate	0,29643	1052091						THBS1	0,25459	0,834993
x4_Acetamidobutanoate	0,2972	1056327						IGKV1_39	0,25602	0,842
C6	0,29894	1066002						Pyridoxal	0,25608	0,842302
ELANE	0,30272	1087125						L_glutamate	0,25853	0,854306
LinoleicAcid__9Z_12Z__OctadecadienoicAcid_	0,30532	1101829						alpha_D_Ribose1_phosphate_uM_	0,26251	0,874031
GEN1	0,30677	1110071						alpha_D_Ribose1_phosphate	0,26281	0,875561
CNTLN	0,30692	1110872						beta_L_Arabinose1_phosphate	0,26281	0,875561
Dimethylglycine	0,30747	1114028						Citrate	0,26388	0,880909
IGKV1_39	0,30833	1118941						Pantothenol	0,2648	0,885489
Pantothenol	0,30839	1119284						CA2	0,27178	0,920891
L_Selenomethionine	0,30931	1124551						HexadecenoicAcid_PalmitoleicAcid_	0,27184	0,921217
Spermidine	0,30946	1125431						x8_Methoxykynurenate	0,28141	0,971022
AMBP	0,31205	1140321						x2_Oxoglutarate	0,28147	0,971347
Xanthine	0,31376	1150212						Glycerol3_phosphate_uM_	0,28288	0,978769
TTF2	0,31826	1176513						NOLC1	0,28425	0,986068
a_LinolenicAcid_OctadecatrienoicAcid_	0,31866	1178919						BAHCC1	0,28425	0,986068
alpha_D_Ribose1_phosphate_uM_	0,32388	120987						ITPR3	0,28425	0,986068
Spermine	0,32605	1222907						NUP214	0,28425	0,986068
IGHV1_8	0,32755	1231962						PGLYRP1	0,29158	1025548
IGHV1_46	0,32899	1240657						LTF	0,29235	10297
L_aspartate_uM_	0,33415	1272272						Sedoheptulose7_phosphate_uM_	0,29738	1057372
IGHV3_11	0,33455	1274742						TFPI	0,30225	1084489
S Glutathionyl L cysteine	-0,51496		2737193					Sedoheptulose7_phosphate	0,30381	1093266
TF	-0,46503		2252876					N_formylKynurenine	0,30469	1098253
IGLV4_69	-0,45036		2123603					GEN1	0,30602	1105789
L_arginine	-0,44365		2066219					TTF2	0,30689	1110743
CLEC3B	-0,435		1994005					IGHV3_11	0,31387	1150857
x3_Sulfino_L_alanine	-0,43031		1955539					Dehydroascorbate_uM_	0,31697	116893
L arginine	-0,4073		1774432					Dehydroascorbate	0,31834	1177015
L cystine	-0,40519		1758354					PPBP	0,31994	1186466
PON1	-0,39422		1676665					x5_Oxoproline	0,32002	1186946
Urate	-0,38215		1589695					x2_3_Phospho_D_glycerate	0,32033	1188754
x 5 L Glutamyl L glutamine	-0,37817		1561616					IGKV4_1	0,3348	1276265
L cystine	-0,37679		1551974					Lactate	0,33563	1281382
L threonine	-0,37541		1542375					L_cystine_uM_	-0,50501		2634887
Pyridoxamine5 phosphate	-0,36758		1488665					L_cystine	-0,48814		2468189
S Glutathionyl L cysteine	-0,36556		1474981					x3_Sulfino_L_alanine	-0,46902		2289003
A2M	-0,36319		145902					L_arginine	-0,45021		2122243
FERMT3	-0,35807		1424916					L_threonine_uM_	-0,44118		2045439
ACTN1	-0,3579		1423831					FERMT3	-0,40822		1781386
TPM4	-0,3579		1423831					ACTN1	-0,40803		177997
TUBB1	-0,3579		1423831					TPM4	-0,40803		177997
ITGA2B	-0,3579		1423831					TUBB1	-0,40803		177997
SERPINA5	-0,35182		1384029					ITGA2B	-0,40803		177997
COMP	-0,34517		1341273					SERPINA5	-0,39692		1696502
APOM	-0,34482		1339068					L_Cysteate	-0,38519		1611313
x2_3_Phospho_D_glycerate	0,34688			1352197				L_arginine_uM_	-0,38366		1600413
Lactate	0,34811			1360056				Thiocysteine	-0,37796		1560225
alpha_D_Ribose1_phosphate	0,37755			1557332				Urate	-0,37234		1521188
beta_L_Arabinose1_phosphate	0,37755			1557332				APOA2	-0,35634		1413559
x2_Oxoglutarate	0,37878			1565926				IGKV2_28	-0,35438		1400674
HexadecenoicAcid_PalmitoleicAcid_	0,38139			1584276				L_tyrosine_uM_	-0,35291		1391121
PRX	0,38364			1600292				CRISP3	-0,35282		139048
TGFBI	0,38738			1626996				IGLV8_61	0,34311			132817
Ectoine	0,39902			1712109				g_Oxalo_crotonate	0,35138			1381189
L_Tryptophanamide	0,41264			1815394				Glycerol3_phosphate	0,35659			1415149
Creatine	0,41482			1832269				Hypoxanthine	0,36989			15044
IGKV4_1	0,44168			2049669				gamma_Glutamyl_gamma_aminobutyrate	0,37739			1556205
LTF	0,44422			2071092				PRX	0,3827			1593596
L_glutamate	0,45331			2149097				acetyl_carnitine_acyl_C2_	0,38596			1616795
Malate	0,4599			220702				Ectoine	0,40753			1776141
Hypoxanthine	0,48306			2419531				Malate	0,4089			1786642
Nicotinamide	0,54455			3060651				Nicotinamide	0,55331			3162191
g_Oxalo_crotonate	0,54547			307119				L_Tryptophanamide	0,55774			3214635
shape_ratio	0,90665			128081				echi	0,90665			128081

## Sheet: Correlation data-RBC
Correlations with echinocyte percentage							Correlations with shape ratio
	R	Insig	Neg Sig	Pos sig				R	Insig	Neg Sig	Pos sig
Var21	-0,32826	1295558					RNH1	-0,32308	1262736
TTR	-0,32374	1266915					A2M	-0,31753	1228053
IGHG2	-0,32294	1261822					Phosphate	-0,31697	1224608
Sedoheptulose1_phosphate	-0,32021	1244727					CD59	-0,31466	1210363
CD5L	-0,31621	1219884					IGKV3_11	-0,31006	1182349
GSN	-0,31015	1182878					CMBL	-0,30702	1164024
APOA4	-0,2999	1121697					COPS8	-0,30674	1162323
Var34	-0,29424	1088736					DENR	-0,30661	1161541
Phosphocreatine	-0,28147	1016365					x2_Hydroxyglutarate_Citramalate	-0,30151	1131179
Malate	-0,2634	0,918581					RHD	-0,30114	1129029
Var100	-0,26133	0,907701					Var21	-0,29845	1113233
CMBL	-0,25938	0,897566					HPX	-0,29688	1104042
PON1	-0,25893	0,89524					FAM49B	-0,29625	1100387
PIGR	-0,25754	0,888032					x10_Formyltetrahydrofolate	-0,29481	1092014
BCAM	-0,25752	0,887931					GRHPR	-0,29315	1082416
acyl_C18_2_OH	-0,2572	0,886257					MAPK1	-0,29	1064382
UBE2V1	-0,25274	0,863406					L_Tryptophanamide	-0,28965	1062412
AKR1B1	-0,24486	0,823735					IGHM	-0,28868	1056882
LZIC	-0,24486	0,823735					x1_4_beta_D_Xylan	-0,28244	1021737
CMYA5	-0,24486	0,823735					IGKV3D_20	-0,2816	1017055
BMP2K	-0,24486	0,823735					PSMA4	-0,27926	1004124
SLC16A1	-0,24486	0,823735					SMIM1	-0,27843	0,999523
ICAM4	-0,24486	0,823735					PGLYRP2	-0,27699	0,991613
RTCA	-0,24405	0,819731					CMYA5	-0,27693	0,991272
HPX	-0,24322	0,815593					BMP2K	-0,27693	0,991272
CLU	-0,24163	0,807767					REXO2	-0,27466	0,978893
IGKV2_28	-0,24016	0,800574					APOA4	-0,27412	0,975925
x4_Acetamidobutanoate	-0,24016	0,800519					EIF6	-0,27111	0,959635
WIPI2	-0,23738	0,786987					Ectoine	-0,26931	0,949968
x1_4_beta_D_Xylan	-0,23602	0,780415					RAN	-0,26185	0,910413
Diphosphate	-0,23448	0,772962					CD5L	-0,2616	0,909107
AFM	-0,22867	0,745259					GlutathioneDisulfide	-0,26079	0,9049
Ectoine	-0,22829	0,743499					AFM	-0,26034	0,902534
EIF4A3	-0,22689	0,736885					BLVRB	-0,26015	0,901564
x5_Hydroxyisourate	-0,22673	0,736127					UBA3	-0,25994	0,900457
Putrescine	-0,22621	0,733698					WIPI2	-0,25931	0,897189
ITIH1	-0,22517	0,728832					Indoxyl	-0,25203	0,859775
IGKV3D_20	-0,22215	0,71478					DDI2	-0,25044	0,851706
SLC2A1	-0,21557	0,68466					PON1	-0,2504	0,851521
S100A8	-0,21509	0,682459					UBE2V1	-0,24808	0,839802
METTL7A	-0,21495	0,681853					UROS	-0,24685	0,833688
IGLC3	-0,21196	0,66837					LZIC	-0,24435	0,821224
CD59	-0,20827	0,651948					Var34	-0,23821	0,791021
Succinate	-0,20762	0,649074					RAB7A	-0,23805	0,790244
KNG1	-0,20485	0,636896					Pantothenol	-0,23657	0,783043
EIF6	-0,20468	0,636162					Phosphoserine	-0,22987	0,750948
F2	-0,1992	0,612379					kynurenine	-0,22574	0,731516
TKFC	-0,19471	0,593238					Formyl_5_hydroxy_kynurenamine	-0,22574	0,731516
FN1	-0,19124	0,578626					EIF5	-0,22444	0,725427
GTP	-0,19006	0,573684					IGHG2	-0,22327	0,719968
Var789	-0,18695	0,560778					trans_4_Hydroxy_L_proline	-0,21853	0,698124
CP	-0,18628	0,558022					TBC1D24	-0,21695	0,690902
C1QC	-0,18574	0,555783					IGHG4	-0,21669	0,689732
SOD1	-0,18566	0,55544					TSN	-0,21648	0,688797
BLVRB	-0,18447	0,550583					acyl_C18_2_OH	-0,21595	0,686386
PITPNA	-0,18419	0,549428					IGKV2_28	-0,21271	0,671763
UBA3	-0,18397	0,548536					BCAM	-0,21226	0,669708
GMFG	-0,18091	0,536077					NR2C2AP	-0,21177	0,667541
GPX4	-0,17956	0,530649					UBA1	-0,21115	0,664763
CFHR2	-0,17956	0,530649					ST13	-0,20926	0,656355
FSCN1	-0,17935	0,529795					HPR	-0,20638	0,64363
PGLYRP2	-0,17904	0,528547					PEBP1	-0,20296	0,628655
UTP	-0,17664	0,51893					NIT1	-0,2028	0,627935
Var422	-0,17225	0,501538					NIF3L1	-0,19783	0,60653
L_glutamine	-0,17198	0,500492					PRKACA	-0,1972	0,603818
GSTT1	-0,17184	0,499928					gamma_L_Glutamyl_D_alanine	-0,19637	0,600257
C7	-0,16935	0,490179					ENO1	-0,19605	0,598927
ACP1	-0,16601	0,477256					NAPRT	-0,19478	0,593528
acyl_C6_DC	-0,16527	0,474411					PTPN11	-0,19472	0,59329
PPIL3	-0,165	0,473389					PITHD1	-0,19351	0,588128
SERPINC1	-0,16386	0,469032					ITIH1	-0,1919	0,5814
FGB	-0,16193	0,461678					F2	-0,1913	0,578857
MTPN	-0,16169	0,460761					USP15	-0,19082	0,576852
IGKV3_11	-0,16147	0,459946					KNG1	-0,19049	0,575478
Acetylcholine	-0,16062	0,456714					SEC14L4	-0,1895	0,571363
ITIH2	-0,16018	0,455039					METTL7A	-0,18948	0,571266
IGHV5_51	-0,15642	0,440968					PYCR3	-0,18732	0,562313
C1R	-0,15376	0,431106					x5_Hydroxyisourate	-0,18709	0,561347
CAT	-0,15373	0,430966					STX7	-0,18644	0,558666
CCS	-0,15351	0,430158					CUL4A	-0,1849	0,552361
SERPINF2	-0,15128	0,421957					Fumarate	-0,184	0,548643
DDI2	-0,15083	0,420331					PITPNA	-0,18381	0,547876
UBA5	-0,14889	0,413278					PSMB1	-0,18082	0,535719
Taurine	-0,14874	0,412727					DDB1	-0,18004	0,532584
NR2C2AP	-0,14691	0,406127					Var745	-0,17919	0,529149
RNH1	-0,14685	0,405906					FLG2	-0,17919	0,529149
x2_Oxoglutarate	-0,14616	0,403403					ABRAXAS2	-0,17919	0,529149
Pyruvate	-0,14564	0,401549					SBSN	-0,17919	0,529149
IST1	-0,14367	0,39449					CAT	-0,17765	0,522951
A1BG	-0,14342	0,393619					IGHV3_43D	-0,17565	0,51496
PLG	-0,14171	0,387545					DAZAP1	-0,17233	0,501869
ALAD	-0,14163	0,387248					ITIH2	-0,1717	0,499393
GC	-0,1414	0,386433					CLU	-0,17161	0,499023
IGHV1_8	-0,14113	0,385482					C4B	-0,17142	0,498297
SHPK	-0,14053	0,383388					RTCA	-0,16985	0,492144
HRG	-0,13716	0,37156					TKFC	-0,16921	0,489656
IGHG3	-0,13664	0,369755					SOD1	-0,16718	0,481789
REXO2	-0,13615	0,368069					UBA5	-0,16679	0,480277
GlutathioneDisulfide	-0,13325	0,35803					KRT6C	-0,16626	0,478208
C1S	-0,1329	0,356844					PLG	-0,16568	0,475981
Sphingosine1_phosphate	-0,13222	0,354499					OTUB1	-0,16562	0,475773
ITIH3	-0,13176	0,35294					ALAD	-0,16507	0,473635
Indole_3_acetaldehyde	-0,1317	0,352725					METAP2	-0,16466	0,472087
NIT1	-0,13039	0,348257					FN1	-0,16362	0,468113
SERPINF1	-0,12971	0,345958					PSMD8	-0,16352	0,467704
IGLV3_21	-0,12823	0,340949					Var100	-0,16044	0,456044
IGKC	-0,1244	0,328124					NIT2	-0,15818	0,447539
Carnosine	-0,11982	0,313015					Indole_3_acetaldehyde	-0,1572	0,443842
ST13	-0,11935	0,311465					Glycerol3_phosphate	-0,1572	0,443842
RAB7A	-0,11927	0,311224					Carnosine	-0,15565	0,438088
CPN2	-0,11823	0,307823					OctanoicAcid_caprylicAcid_	-0,15565	0,438088
RBP4	-0,11798	0,307003					x10_Formyldihydrofolate	-0,15307	0,428559
KRT6C	-0,11785	0,306598					CMP_N_acetylneuraminate	-0,15204	0,424766
VTN	-0,11515	0,297871					L_proline	-0,14947	0,415352
IGLV3_27	-0,11427	0,295026					Adenosine	-0,14792	0,409749
IGLV1_51	-0,11427	0,295026					SH3BGRL	-0,14748	0,408157
VWF	-0,11427	0,295026					AKR1B1	-0,14661	0,405033
IGHV3_7	-0,11427	0,295026					SLC16A1	-0,14661	0,405033
IGKV1_27	-0,11427	0,295026					ICAM4	-0,14661	0,405033
IGLV1_44	-0,11427	0,295026					GSTT1	-0,14339	0,39349
IGHV1_24	-0,11427	0,295026					IGLC3	-0,14316	0,392684
F13B	-0,11427	0,295026					SERPINC1	-0,14105	0,385198
CPB2	-0,11427	0,295026					PTGES3	-0,14024	0,38236
IGHV3_21	-0,11427	0,295026					SLC2A1	-0,13911	0,378367
CPN1	-0,11427	0,295026					PSMC3	-0,1387	0,376927
IGHV2_5	-0,11427	0,295026					BLMH	-0,13855	0,37642
ATRN	-0,11427	0,295026					SCFD1	-0,1378	0,373783
FBLN1	-0,11427	0,295026					RAB10	-0,13778	0,373711
ECM1	-0,11427	0,295026					AMPD3	-0,13746	0,372603
NAPRT	-0,11369	0,293163					ADD3	-0,13694	0,370805
alpha_D_Glucosamine1_phosphate	-0,11362	0,292967					APOC1	-0,13609	0,367857
APOA2	-0,11359	0,292864					ANXA7	-0,13354	0,359042
MAPK1	-0,11021	0,282113					VTN	-0,13306	0,357387
g_Oxalo_crotonate	-0,11001	0,281482					CAPN1	-0,13254	0,355611
NSF	-0,10748	0,273534					YWHAZ	-0,13182	0,353155
IGHA1	-0,10725	0,272817					acyl_C18_2_Linoleoyl_CoA_	-0,13143	0,351796
TetradecanoicAcid_myristicAcid_	-0,10691	0,271752					C1QC	-0,13094	0,35013
IGHG4	-0,10654	0,270608					Acetylcholine	-0,1304	0,348286
IGHV3_43D	-0,10596	0,268798					Var422	-0,13034	0,348092
GNB1	-0,1056	0,267679					FAM114A2	-0,12913	0,343998
EPB41	-0,10523	0,26653					IST1	-0,12831	0,341226
Pyridoxal	-0,10484	0,265336					XPO1	-0,12643	0,334907
PARK7	-0,1045	0,264273					acyl_C4_DC	-0,12627	0,334372
x10_Formyldihydrofolate	-0,10174	0,255793					Var789	-0,12366	0,325672
CMP_N_acetylneuraminate	-0,10174	0,255793					GMFG	-0,12301	0,323508
FN3KRP	-0,1015	0,255058					L_glutamine	-0,12112	0,317277
ATP	-0,10123	0,254215					TPI1	-0,12105	0,317043
C4A	-0,10101	0,253568					PPCS	-0,12101	0,316926
MVD	-0,10081	0,25293					DARS	-0,12091	0,316584
TALDO1	-0,09997	0,250395					RHCE	-0,12045	0,315074
NIT2	-0,09916	0,247921					Malate	-0,11957	0,312204
PROS1	-0,09859	0,246195					HBA1	-0,11882	0,30976
JCHAIN	-0,09683	0,240884					HAGH	-0,11855	0,308874
HexadecanoicAcid_palmiticAcid_	-0,09555	0,237051					GMPPA	-0,1181	0,307417
IGHV4_39	-0,09459	0,23419					PDE12	-0,11701	0,30388
x10_Formyltetrahydrofolate	-0,09348	0,230896					SHPK	-0,11687	0,303416
Dehydroascorbate	-0,09296	0,229369					PF4	-0,1143	0,295138
CFH	-0,09254	0,228104					PFKL	-0,11425	0,294975
ORM2	-0,08995	0,220497					HEBP2	-0,11403	0,294273
PSMA4	-0,08971	0,219784					ATP6V1D	-0,11237	0,288969
PEBP1	-0,08861	0,216575					PNP	-0,11223	0,288522
XPO1	-0,08835	0,215825					GC	-0,11092	0,284381
Glycerol3_phosphate	-0,08832	0,215732					IGKV1_8	-0,10914	0,278758
METAP2	-0,08735	0,212936					alpha_D_Ribose1_phosphate	-0,10875	0,277514
HEBP1	-0,08548	0,207524					beta_L_Arabinose1_phosphate	-0,10875	0,277514
C8A	-0,08472	0,205338					ATG7	-0,10858	0,276971
Var745	-0,08162	0,196509					PGM2L1	-0,10834	0,276216
FLG2	-0,08162	0,196509					VTA1	-0,10827	0,276027
ABRAXAS2	-0,08162	0,196509					GCLM	-0,10784	0,274677
SBSN	-0,08162	0,196509					CP	-0,10597	0,26883
IGHV1_18	-0,0805	0,193345					PARK7	-0,10584	0,268411
Indole_3_acetate	-0,0785	0,187729					CCT8	-0,1053	0,266763
FGG	-0,07724	0,18419					GMPPB	-0,10483	0,265304
ATXN3	-0,07683	0,18305					F12	-0,10369	0,261782
GNPDA1	-0,07589	0,180449					IGKC	-0,10345	0,261045
RAN	-0,07478	0,177394					C8A	-0,10327	0,260467
GMPR	-0,07469	0,177146					ATP2B4	-0,10245	0,257967
a_LinolenicAcid_OctadecatrienoicAcid_	-0,07385	0,174834					SORD	-0,10145	0,254894
IGKV3_20	-0,07284	0,172056					GDI2	-0,1009	0,253226
IGKV3D_15	-0,07284	0,172056					RAB3IL1	-0,10011	0,250813
SERPINA5	-0,07284	0,172056					COASY	-0,09912	0,247806
x2_Oxoglutaramate	-0,07282	0,172004					HRG	-0,09904	0,247575
RHCE	-0,07058	0,165897					CDC37	-0,09901	0,24746
MRI1	-0,07056	0,165827					GMPR	-0,09861	0,246264
SLC14A1	-0,07027	0,165045					ARHGDIA	-0,09807	0,244621
ABCB6	-0,07027	0,165045					x4_Pyridoxate	-0,09741	0,242642
DAZAP1	-0,07021	0,16488					g_Oxalo_crotonate	-0,09741	0,242642
ITIH4	-0,06905	0,161756					CBR1	-0,09708	0,241633
FCN3	-0,06764	0,157959					TALDO1	-0,09588	0,23805
ANKFY1	-0,06665	0,155305					GSTO1	-0,09419	0,232993
GRHPR	-0,06638	0,154598					IGKV1_16	-0,09281	0,228913
DDB1	-0,06584	0,153156					LANCL2	-0,0928	0,228876
DocosapentaenoicAcid__7Z_10Z_13Z_16Z_19Z__Docosa_7_10_13_16_19_	-0,06559	0,152489					MTPN	-0,08983	0,220144
UBE2V2	-0,06503	0,150998					Taurine	-0,08968	0,219704
SLC40A1	-0,06243	0,144148					WARS	-0,08952	0,219236
SERPINA6	-0,06226	0,143682					GGCT	-0,08769	0,213923
ENDOD1	-0,05806	0,132774					CLIC1	-0,08673	0,211125
CFB	-0,05788	0,132303					SERPINF2	-0,08669	0,211012
DCXR	-0,0567	0,129263					GUK1	-0,08658	0,210701
O_octadecenoyl_L_carnitine_acyl_C18_1_	-0,0563	0,128229					SLC29A1	-0,08396	0,203176
IGKV1_13	-0,05572	0,126755					SERPINB1	-0,0834	0,20157
FAM49B	-0,05339	0,120841					PREP	-0,0832	0,20099
IGHV3_15	-0,05279	0,119301					GNPDA1	-0,08307	0,200632
Spermine	-0,05268	0,119038					APRT	-0,08205	0,19774
C8G	-0,05211	0,117601					C4A	-0,08199	0,197541
SAA1	-0,05154	0,116163					S100A8	-0,08156	0,196352
HPR	-0,05135	0,115686					C1QA	-0,08145	0,196031
OctanoicAcid_caprylicAcid_	-0,05113	0,115137					EIF2B4	-0,08145	0,196031
TBC1D24	-0,05088	0,114509					PPP2R5D	-0,08145	0,196031
C1QB	-0,05051	0,113588					PPP1R14B	-0,08145	0,196031
HEBP2	-0,04897	0,109752					PRKAA1	-0,08145	0,196031
C4BPA	-0,04772	0,106649					TUBB4A	-0,08145	0,196031
UBA1	-0,04759	0,106338					GPX1	-0,08142	0,195936
CNP	-0,04736	0,105761					HEBP1	-0,08088	0,194418
P4HB	-0,04685	0,104489					S100A4	-0,08086	0,194363
COPS8	-0,04665	0,104014					GNB1	-0,08065	0,193759
acyl_C5_OH_hydroxyisovalerylcarnitine_	-0,04597	0,102323					TTC38	-0,08059	0,193596
acyl_C18_2_Linoleoyl_CoA_	-0,04442	0,098536					O_octadecenoyl_L_carnitine_acyl_C18_1_	-0,0804	0,193067
APOC1	-0,04439	0,098482					L_leucine	-0,07989	0,191613
L_alanine	-0,04287	0,094771					KRT16	-0,07982	0,191424
APOB	-0,04262	0,094166					RAB1B	-0,07977	0,191283
LRG1	-0,04208	0,092874					GPI	-0,07969	0,191047
CUL4A	-0,04141	0,091252					MVD	-0,07918	0,189626
OctadecenoicAcid_OleicAcid_	-0,0408	0,089787					APOA2	-0,07793	0,186132
HBQ1	-0,03946	0,086573					FSCN1	-0,07693	0,183335
C5	-0,03942	0,086467					GLIPR2	-0,07683	0,18307
APOD	-0,03899	0,085461					FLOT1	-0,07553	0,179457
FERMT3	-0,03854	0,084384					Succinate	-0,07422	0,175835
PYCR3	-0,03733	0,081514					TetradecanoicAcid_myristicAcid_	-0,0737	0,174418
QDPR	-0,03718	0,081152					RAP1A	-0,07362	0,174191
AZGP1	-0,03655	0,079663					DNAJA4	-0,07337	0,173511
C2	-0,03407	0,073853					TPP2	-0,07312	0,172812
PITHD1	-0,03405	0,073807					IGKV1_33	-0,07306	0,172663
APOE	-0,03387	0,07339					SNCA	-0,07301	0,172527
x_5_L_Glutamyl__L_glutamine	-0,03305	0,071486					USP5	-0,07286	0,172114
S100A4	-0,03246	0,070116					FERMT3	-0,07221	0,170336
NIF3L1	-0,03182	0,068634					KRAS	-0,07217	0,170214
CSE1L	-0,0318	0,068588					TCP1	-0,07101	0,167057
FGA	-0,03177	0,068507					UBE2N	-0,06943	0,162765
Dihomo_gamma_linolenicAcid__8Z_11Z_14Z__IcosatrienoicAcid_	-0,0315	0,067897					IGHV5_51	-0,06856	0,160434
EIF5	-0,02946	0,06319					Spermine	-0,06855	0,160403
COASY	-0,02879	0,061675					propionyl_carnitine_acyl_C3_	-0,06855	0,160403
PGLS	-0,02819	0,060301					RAB5B	-0,06792	0,158716
CLIC1	-0,02802	0,059907					ENOSF1	-0,06773	0,15819
C8B	-0,02771	0,059215					HK1	-0,06667	0,155368
LUM	-0,02732	0,058315					LTA4H	-0,06635	0,154517
x5_Oxoproline	-0,02582	0,054945					PSMD10	-0,06596	0,153471
IGKV1_33	-0,02536	0,053892					ACP1	-0,06565	0,152637
Dimethylglycine	-0,02531	0,053784					acyl_C5_OH_hydroxyisovalerylcarnitine_	-0,06546	0,152131
acyl_C4_DC	-0,02531	0,053784					SERPIND1	-0,06401	0,148301
KRT16	-0,02504	0,053189					PSMB4	-0,06383	0,147813
LinoleicAcid__9Z_12Z__OctadecadienoicAcid_	-0,02479	0,052625					KLKB1	-0,06378	0,147697
SCFD1	-0,02432	0,051572					L_valine	-0,06339	0,146673
PTGES3	-0,02342	0,049567					HexadecanoicAcid_palmiticAcid_	-0,06339	0,146673
AMBP	-0,02302	0,048658					x2_Oxoglutarate	-0,06236	0,14396
PSMB4	-0,02262	0,047779					APOB	-0,0616	0,141968
PNP	-0,0212	0,044635					TLN1	-0,06101	0,140429
ADD3	-0,02081	0,043779					GDP	-0,06082	0,139914
UDP_glucose	-0,01963	0,041173					DTYMK	-0,0605	0,139081
STX7	-0,01879	0,039344					IGHA1	-0,05932	0,136011
KRT2	-0,01785	0,037295					Dimethylglycine	-0,05876	0,134558
D_Arabitol	-0,01756	0,036666					Putrescine	-0,05876	0,134558
ENO1	-0,01654	0,034464					FLNA	-0,05857	0,134073
DHRS11	-0,01632	0,03399					PTBP1	-0,05852	0,133955
C6	-0,01597	0,03323					DYNLL2	-0,0581	0,132857
FBXO7	-0,01427	0,029579					GDI1	-0,05691	0,129807
HDHD2	-0,01418	0,029388					NSF	-0,05611	0,127745
YWHAZ	-0,0135	0,027918					A1BG	-0,05575	0,126825
PF4	-0,01325	0,027404					BPGM	-0,05469	0,124129
C9	-0,01217	0,025106					MPST	-0,05465	0,124019
AQP1	-0,01197	0,024688					Pyruvate	-0,05412	0,122675
SLC29A1	-0,01075	0,022094					PRDX6	-0,0539	0,122134
C3	-0,00981	0,020133					HSPA5	-0,05375	0,121743
DodecanoicAcid_lauricAcid_	-0,0093	0,019047					EIF4E	-0,05246	0,118478
PURA	-0,00823	0,016825					C1R	-0,05199	0,117293
ARG1	-0,00782	0,015977					PPP6R1	-0,05024	0,112912
HAGH	-0,00544	0,01104					HP	-0,0495	0,111068
HDGF	-0,00465	0,009421					DHRS11	-0,04887	0,109501
SERPIND1	-0,00454	0,009204					CCT2	-0,04746	0,106005
ATP2B4	-0,00415	0,008402					PPP5C	-0,04709	0,105092
PTPN11	-0,00367	0,007416					NACA	-0,04689	0,104605
GPI	-0,00259	0,00523					ISG15	-0,04675	0,104252
Nicotinamide	-0,00258	0,005212					ADSL	-0,04595	0,102296
ADIPOQ	-0,00172	0,003462					C7	-0,04497	0,099895
PGM2	-0,00155	0,003129					Sphingosine1_phosphate	-0,04484	0,099567
CFHR1	-0,0015	0,003007					APOL1	-0,04408	0,097703
IGKV1_16	-0,00065	0,001305					UBE2V2	-0,04248	0,093837
ADSL	0	0					APOD	-0,04209	0,092884
PRKACA	0,000617	0,00124					PPP6C	-0,042	0,092664
SERPINA1	0,000775	0,001558					FDPS	-0,0419	0,092438
octenoyl_l_carnitine_acyl_C8_1_	0,001033	0,002077					CNP	-0,04159	0,091687
HSPA5	0,001077	0,002168					C1S	-0,04136	0,091129
KRT9	0,002328	0,004694					x5_Oxoproline	-0,04123	0,090824
TetradecenoylCarnitine_acyl_C14_1_	0,006714	0,013676					Dihomo_gamma_linolenicAcid__8Z_11Z_14Z__IcosatrienoicAcid_	-0,04123	0,090824
DENR	0,007066	0,014407					IGHV1_8	-0,04089	0,089995
HBA1	0,007749	0,015819					PPM1A	-0,04086	0,089936
SERPINB1	0,008646	0,017688					RNPEP	-0,03977	0,087321
CBR1	0,009339	0,019138					L_alanine	-0,03917	0,085884
PSME1	0,009907	0,020329					NAPA	-0,03907	0,085636
GUK1	0,011464	0,023609					PSME1	-0,03877	0,084922
AGT	0,011615	0,023925					KRT2	-0,03846	0,084205
GCLM	0,011979	0,024697					FN3KRP	-0,03802	0,083141
FLOT1	0,013219	0,02733					GLRX	-0,03764	0,082253
SERPING1	0,013283	0,027469					FGB	-0,03763	0,082222
C4B	0,013514	0,027959					PGLS	-0,03583	0,07797
GLRX	0,014145	0,029309					IGHG3	-0,03531	0,076761
DARS	0,0143	0,029639					AQP1	-0,03403	0,073755
PTBP1	0,015404	0,032008					ATP	-0,03402	0,073724
acetyl_carnitine_acyl_C2_	0,015494	0,032199					TBCEL	-0,034	0,073694
C1QA	0,016324	0,03399					a_LinolenicAcid_OctadecatrienoicAcid_	-0,0335	0,072527
EIF2B4	0,016324	0,03399					MRI1	-0,03348	0,072476
PPP2R5D	0,016324	0,03399					Phosphoenolpyruvate	-0,03247	0,070132
PPP1R14B	0,016324	0,03399					PURA	-0,0318	0,068578
PRKAA1	0,016324	0,03399					MPP1	-0,0315	0,067892
TUBB4A	0,016324	0,03399					CCT7	-0,0315	0,067887
THOP1	0,017548	0,036642					AGO2	-0,03128	0,067389
UDP_N_acetyl_D_glucosamine	0,01756	0,036666					MSN	-0,03022	0,064931
F12	0,018057	0,037749					ACO1	-0,02971	0,063778
DERA	0,018543	0,038807					C8B	-0,02942	0,063104
PSMD10	0,018996	0,039796					PSMA3	-0,02905	0,062256
APRT	0,019255	0,040362					DCUN1D1	-0,02861	0,06125
COPS2	0,019329	0,040525					PSMD7	-0,02852	0,061045
COPS7A	0,019511	0,04092					CFH	-0,02786	0,059548
MPST	0,020243	0,042527					C1QB	-0,02766	0,0591
NEDD8	0,020461	0,043006					DodecanoicAcid_lauricAcid_	-0,0268	0,057149
PSMD5	0,021891	0,046163					PGK1	-0,02657	0,056619
BLMH	0,02236	0,047203					QDPR	-0,0262	0,055804
IGKV1D_12	0,022628	0,047799					PEPD	-0,02595	0,055241
KLKB1	0,022799	0,048177					PAK2	-0,02584	0,054985
ADPRHL2	0,023422	0,049567					COPS2	-0,02555	0,05432
EIF4B	0,024148	0,051186					acetyl_carnitine_acyl_C2_	-0,02525	0,053666
DYNLL2	0,025085	0,053283					NEDD8	-0,02461	0,052213
COPS6	0,025446	0,054098					PLSCR1	-0,02337	0,04946
IGKV1_8	0,025861	0,055029					SLC14A1	-0,02337	0,04946
PIP4K2A	0,029599	0,063516					RO60	-0,02337	0,04946
GLRX3	0,0305	0,065582					P4HB	-0,02337	0,04946
Citrate	0,032021	0,069092					STMN1	-0,02337	0,049436
Sphingosine	0,032537	0,070285					GNAI3	-0,02337	0,049436
GPS1	0,032938	0,071215					OSBP2	-0,02337	0,049436
x3_Phosphonooxypyruvate	0,033054	0,071486					ETF1	-0,02337	0,049436
WIPI1	0,033819	0,073267					HDGF	-0,02318	0,049037
LTA4H	0,033892	0,073436					IGHV3_15	-0,02258	0,047682
UBXN1	0,034144	0,074023					PSMC6	-0,02204	0,046501
ARHGDIB	0,036528	0,079621					ACTR1A	-0,02069	0,043519
APOH	0,037623	0,082206					RAB11B	-0,02006	0,042125
ArachidonicAcid_EicosatetraenoicAcid_	0,037702	0,082395					Hypoxanthine	-0,01855	0,038831
TPM3	0,038155	0,083467					NME1	-0,01835	0,03838
DecanoicAcid_capricAcid_	0,038218	0,08362					PSMA7	-0,01709	0,035655
GDI2	0,038531	0,084363					Glutathione	-0,01701	0,035472
ACTC1	0,039589	0,086886					STAT5A	-0,017	0,035462
D_Ribose	0,039768	0,08731					PIK3C2B	-0,01629	0,033919
L_Arabinose	0,039768	0,08731					CLIC4	-0,01629	0,033919
PSMD8	0,0399	0,087629					BABAM1	-0,01629	0,033919
KRAS	0,040595	0,08929					ADRM1	-0,01629	0,033919
CFI	0,041463	0,091381					RPLP0	-0,01629	0,033919
FLNA	0,04165	0,091831					HNRNPD	-0,01629	0,033919
ANXA7	0,042272	0,093331					STAMBP	-0,01629	0,033919
L_cystine	0,042446	0,093751					SYNCRIP	-0,01629	0,033919
Spermidine	0,044416	0,098536					MINDY3	-0,01629	0,033919
TetradecenoicAcid_myristoleicAcid_	0,044416	0,098536					VASP	-0,01629	0,033919
RNPEP	0,044836	0,099562					UBE2I	-0,01629	0,033919
CAPN1	0,044877	0,09966					EHD1	-0,01629	0,033919
IGFALS	0,046845	0,104489					VPS4A	-0,01629	0,033919
PSMF1	0,047053	0,105003					NHLRC2	-0,01629	0,033919
ATG7	0,047398	0,105856					PRMT1	-0,01629	0,033919
DTYMK	0,047444	0,105967					BAX	-0,01629	0,033919
YWHAG	0,047505	0,106116					C9orf64	-0,01629	0,033919
ABHD14B	0,04847	0,108507					ECPAS	-0,01629	0,033919
KRT5	0,048619	0,108875					CLNS1A	-0,01629	0,033919
PIK3C2B	0,048972	0,109752					ALDOC	-0,01621	0,033755
CLIC4	0,048972	0,109752					RBP4	-0,01592	0,033126
BABAM1	0,048972	0,109752					RHAG	-0,01579	0,032841
ADRM1	0,048972	0,109752					AK1	-0,01552	0,032256
RPLP0	0,048972	0,109752					FBXO7	-0,01321	0,027307
HNRNPD	0,048972	0,109752					SLC40A1	-0,01298	0,026821
STAMBP	0,048972	0,109752					D_Glucose	-0,01237	0,025525
SYNCRIP	0,048972	0,109752					PSMD6	-0,01215	0,025065
MINDY3	0,048972	0,109752					CARHSP1	-0,01212	0,024996
VASP	0,048972	0,109752					YWHAG	-0,01146	0,0236
UBE2I	0,048972	0,109752					BOLA2	-0,01082	0,02224
EHD1	0,048972	0,109752					C8G	-0,01058	0,021737
VPS4A	0,048972	0,109752					SERPINA4	-0,01045	0,021473
NHLRC2	0,048972	0,109752					ACAT2	-0,01035	0,021258
PRMT1	0,048972	0,109752					PPIL3	-0,00969	0,019865
BAX	0,048972	0,109752					ATXN3	-0,00914	0,018716
C9orf64	0,048972	0,109752					STIP1	-0,00878	0,017964
ECPAS	0,048972	0,109752					PGM2	-0,00827	0,016906
CLNS1A	0,048972	0,109752					CCT6A	-0,00777	0,015864
TBCEL	0,049392	0,110794					Pyridoxal	-0,00722	0,014713
IGHV3_23	0,049651	0,111439					COPS7A	-0,00714	0,014556
APOL1	0,05063	0,113887					EPB41	-0,00671	0,013663
O_dodecenoyl_carnitine_acyl_C12_1_	0,05113	0,115137					x1_3_Bisphosphoglycerate	-0,0067	0,013649
TSN	0,051475	0,116004					ADIPOQ	-0,006	0,012209
PSMA3	0,051921	0,117123					CFL1	-0,00596	0,012128
C20orf27	0,051952	0,117202					PSMB7	-0,00571	0,011597
GMPPB	0,053375	0,120795					LPA	-0,00472	0,009577
COPS5	0,053622	0,121421					HBE1	-0,0044	0,008916
PITPNB	0,055017	0,124962					SPTA1	-0,00361	0,007301
PDE12	0,055768	0,126877					DocosapentaenoicAcid__7Z_10Z_13Z_16Z_19Z__Docosa_7_10_13_16_19_	-0,00155	0,003112
APCS	0,055823	0,127017					EIF4A1	-0,00052	0,001039
IGLV1_40	0,056682	0,129216					IGFALS	0	0
AK1	0,056761	0,129421					EIF4B	0,000803	0,001614
CFL1	0,057162	0,130451					ADP	0,001031	0,002072
PCMT1	0,057494	0,131309					acyl_C5_1_Tiglylcarnitine_	0,001031	0,002072
GBE1	0,058241	0,133234					GLRX3	0,002362	0,004764
UROS	0,061255	0,14106					Dehydroascorbate	0,002577	0,005199
IGHV1_46	0,063735	0,147575					acyl_C20_4	0,002577	0,005199
LBP	0,063735	0,147575					FN3K	0,002607	0,005261
RGS10	0,064295	0,149054					ORM2	0,003038	0,006136
TPM1	0,064663	0,150028					LDHA	0,004401	0,008916
TANGO2	0,065255	0,151595					ANKFY1	0,004886	0,00991
ARHGAP1	0,06592	0,153366					Folate	0,005154	0,010461
USP5	0,066024	0,153644					CCS	0,005193	0,010541
RAB1B	0,066134	0,153935					PICALM	0,007085	0,014443
RHAG	0,067249	0,156917					GCLC	0,007234	0,014753
ENOSF1	0,067866	0,158572					L_Palmitoylcarnitine_acyl_C16_	0,007731	0,015783
ACTR1A	0,06798	0,158878					SERPINA6	0,008304	0,016978
STAT5A	0,068155	0,159342					EIF5A	0,00878	0,017969
NADH	0,068173	0,159392					PPIA	0,008797	0,018005
HK1	0,068424	0,16007					GPS1	0,009059	0,018553
SERPINA4	0,069051	0,161756					NUDT5	0,009926	0,02037
RAB3IL1	0,069086	0,16185					PFKM	0,010593	0,021769
Pyridoxamine5__phosphate	0,069206	0,162178					x4_Acetamidobutanoate	0,010823	0,022254
LANCL1	0,069509	0,162993					PSMC1	0,010888	0,022391
STMN1	0,070239	0,164969					WIPI1	0,011033	0,022697
GNAI3	0,070239	0,164969					UBAC1	0,011138	0,022917
OSBP2	0,070239	0,164969					TPM1	0,011144	0,022931
ETF1	0,070239	0,164969					IGHV4_39	0,011569	0,023829
RO60	0,070267	0,165045					PAFAH1B2	0,012238	0,025244
ISG15	0,070267	0,165045					C3	0,012372	0,02553
AMPD3	0,07061	0,165974					IGHV3_23	0,014157	0,029332
PDXP	0,070717	0,166267					WDR91	0,014292	0,029621
alpha_D_Ribose1_phosphate	0,070756	0,166368					C5	0,014717	0,030533
beta_L_Arabinose1_phosphate	0,070756	0,166368					PRPS1	0,014722	0,030542
ARHGDIA	0,07116	0,167466					PSMA2	0,015054	0,031256
IGHV3_74	0,071618	0,168713					ADD1	0,016003	0,0333
ALDH16A1	0,072675	0,171604					GPX4	0,01629	0,033919
SPTA1	0,073122	0,172825					CFHR2	0,01629	0,033919
RAB5C	0,0734	0,173588					UBB	0,016518	0,034413
PPM1A	0,073811	0,174717					LinoleicAcid__9Z_12Z__OctadecadienoicAcid_	0,017008	0,035472
dTMP	0,075404	0,179109					PSMD4	0,017604	0,036765
FDPS	0,075449	0,179227					CCT4	0,01781	0,037209
D_Glucose	0,07592	0,180535					OctadecenoicAcid_OleicAcid_	0,018039	0,037711
RAP1A	0,077682	0,185433					NADH	0,01907	0,039958
OTUB1	0,077821	0,185826					FCN3	0,01947	0,040835
WARS	0,079564	0,190703					IGHV3_74	0,019853	0,04167
GLO1	0,08047	0,193257					TXNL1	0,019895	0,041766
RAB5B	0,080776	0,194119					x3_Phosphonooxypyruvate	0,020101	0,042216
ATP6V1D	0,080815	0,194234					DecanoicAcid_capricAcid_	0,020616	0,043351
UBE2N	0,081294	0,195581					IMPA1	0,022047	0,046511
PZP	0,081619	0,196509					AGT	0,022078	0,046579
PPBP	0,081619	0,196509					Nicotinamide	0,022162	0,046762
CLEC3B	0,081619	0,196509					IGKV1_13	0,022242	0,046941
KRT3	0,081619	0,196509					x_5_L_Glutamyl__L_glutamine	0,023193	0,049056
KRT12	0,081619	0,196509					PIGR	0,023365	0,049436
SAA4	0,081644	0,196577					JCHAIN	0,023394	0,049504
VTA1	0,08184	0,197131					PROS1	0,024675	0,052365
Biliverdin	0,082634	0,199386					TANGO2	0,025166	0,053464
CHMP4B	0,082657	0,199455					HDHD2	0,025418	0,054029
EPB42	0,082946	0,200274					MDH1	0,025616	0,054477
acyl_C5_1_Tiglylcarnitine_	0,083151	0,200859					C4BPA	0,026141	0,05566
KRT14	0,085729	0,208246					DDT	0,026618	0,056738
LPA	0,08614	0,209426					IGKV3_20	0,027259	0,058186
BOLA2	0,08671	0,211075					IGKV3D_15	0,027259	0,058186
GDP	0,086766	0,211238					SERPINA5	0,027259	0,058186
SNCA	0,086867	0,211528					PKLR	0,027378	0,058459
TTC38	0,08763	0,213738					FASN	0,027496	0,058727
PSMC3	0,087997	0,214805					SERPINF1	0,027794	0,059399
PSMB1	0,089039	0,217836					ERMAP	0,028665	0,061385
SEC14L4	0,089241	0,218424					DNPH1	0,028752	0,06158
USP15	0,089268	0,218503					DMTN	0,029191	0,062587
SLC43A3	0,089411	0,21892					UDP_glucose	0,029378	0,063009
PRPS1	0,090327	0,221603					OXSR1	0,030603	0,06582
DDT	0,090379	0,221755					EPB42	0,030686	0,066012
CRP	0,090816	0,223037					HNRNPK	0,03151	0,067912
PREP	0,091069	0,223778					LASP1	0,031681	0,068303
Ascorbate	0,091414	0,224797					CHMP5	0,032966	0,071282
STOM	0,092963	0,229362					HUWE1	0,033221	0,071876
RPIA	0,093938	0,232258					FGG	0,034285	0,074353
SH3BGRL	0,095421	0,236677					NSFL1C	0,034655	0,075219
ACO1	0,095978	0,238343					WDR77	0,034679	0,075276
CSTB	0,097988	0,244384					IPO5	0,03511	0,076285
ALDH1A1	0,098507	0,24595					PPP2R1A	0,035446	0,077072
Hypoxanthine	0,10019	0,251068					RPIA	0,035576	0,077378
DBNL	0,10091	0,253257					Cys_Gly	0,036078	0,078558
CD47	0,10223	0,257291					CPN2	0,036277	0,079027
PPCS	0,10245	0,257967					AZGP1	0,03647	0,07948
FAM114A2	0,10302	0,259716					ADP_D_ribose	0,037624	0,082211
ADP_D_ribose	0,10329	0,260554					PFN1	0,037777	0,082573
L_Adrenaline	0,10381	0,26214					COPS6	0,038483	0,084247
DocosahexaenoicAcid	0,10433	0,263739					EIF4A2	0,038729	0,084832
PRDX6	0,10545	0,267204					EIF2S1	0,039721	0,087199
ARF1	0,10561	0,267719					HPRT1	0,03984	0,087486
TPI1	0,10837	0,276315					HMBS	0,040268	0,088512
TCP1	0,10867	0,277284					dTMP	0,041232	0,090824
ALDOC	0,10954	0,279998					COPS3	0,041319	0,091033
BPGM	0,11193	0,287569					ALDOA	0,042059	0,09282
HBE1	0,11231	0,288767					HINT1	0,042138	0,093008
CHMP5	0,11238	0,288995					CA1	0,042271	0,093331
AKR1A1	0,11317	0,291528					UBR4	0,043153	0,095463
GSTO1	0,11331	0,291962					PCBP2	0,043645	0,09666
NAPA	0,11381	0,293572					MYL12A	0,044066	0,097682
ACSL4	0,11427	0,295026					UBE2L3	0,045217	0,100491
MDH1	0,11512	0,297776					NQO2	0,045381	0,100897
N_Acetylneuraminate	0,11517	0,297932					UBE2O	0,045695	0,101664
ADD2	0,11531	0,298389					ABCB6	0,046748	0,104252
propionyl_carnitine_acyl_C3_	0,1162	0,301265					NUDCD1	0,046748	0,104252
CSNK1A1	0,11661	0,302561					L_Adrenaline	0,046901	0,104627
PPP6R1	0,11667	0,302779					ARHGDIB	0,047128	0,105186
PLSCR1	0,11711	0,304203					ArachidonicAcid_EicosatetraenoicAcid_	0,047417	0,1059
DHX9	0,11711	0,304203					ITIH4	0,048003	0,107349
PPIA	0,11797	0,306977					UBE2K	0,048435	0,108418
TLN1	0,11922	0,311064					PZP	0,04887	0,109501
RAC1	0,11922	0,311038					PPBP	0,04887	0,109501
sn_glycero_3_Phosphoethanolamine	0,11982	0,313015					CLEC3B	0,04887	0,109501
TKT	0,12034	0,314724					KRT3	0,04887	0,109501
FAH	0,12053	0,315334					KRT12	0,04887	0,109501
IMPA1	0,12066	0,315774					PSAT1	0,049188	0,110289
SERPINA3	0,12074	0,316035					CARM1	0,049249	0,110441
TSNAX	0,12115	0,317386					Hexadecenoyl_carnitine_acyl_C16_1_	0,049478	0,111012
FAF1	0,12196	0,320045					CFB	0,050542	0,113662
LXN	0,1226	0,322156					ADH5	0,050947	0,114678
PFKL	0,12303	0,32359					IDH1	0,051247	0,115431
UBE2O	0,12314	0,323947					SUGT1	0,053074	0,120033
ENO2	0,12479	0,32942					APOH	0,053082	0,12005
SNX2	0,12592	0,333201					WDR1	0,053372	0,120784
TPP2	0,12608	0,333744					AMP	0,053601	0,121369
YOD1	0,12708	0,337091					ARG1	0,05387	0,122047
GCLC	0,12789	0,339808					TAGLN2	0,05406	0,122531
EicosapentaenoicAcid	0,12808	0,340464					PPME1	0,054574	0,123834
RAB10	0,12835	0,341359					GTP	0,055663	0,12661
HRNR	0,13107	0,350587					CCT5	0,055957	0,12736
SORD	0,13122	0,351113					PGP	0,055978	0,127418
PPP5C	0,13154	0,352197					PCMT1	0,056859	0,129672
DCUN1D1	0,1316	0,352382					PA2G4	0,057065	0,130205
GSTM2	0,13332	0,358298					MCTS1	0,057947	0,132474
PPA1	0,13335	0,358387					PIN1	0,058701	0,134416
UBB	0,13423	0,361411					ATP6V1H	0,059676	0,136945
NUDT5	0,13528	0,365029					GSTM2	0,061007	0,140411
NACA	0,13572	0,366552					AKR1A1	0,061651	0,142095
AIDA	0,13577	0,366734					C6	0,061984	0,142969
ADH5	0,13579	0,366794					PAICS	0,062799	0,145105
HP	0,13667	0,369847					PHPT1	0,06283	0,14519
GGCT	0,13742	0,372481					SAA4	0,063763	0,147648
SGTA	0,13799	0,374471					APOE	0,065024	0,150986
ADP	0,13841	0,375935					ATP6V1B2	0,06512	0,151238
HBD	0,14	0,381492					TSNAX	0,065398	0,151977
GMPPA	0,14045	0,383105					CSTB	0,06569	0,152754
CCT8	0,14095	0,384871					UBXN1	0,068147	0,159323
DNAJB1	0,14173	0,387608					FGA	0,068303	0,159743
PICALM	0,14199	0,388521					UTP	0,068552	0,160415
x5_Hydroxyindoleacetate	0,14203	0,388659					acyl_C6_DC	0,069063	0,161793
EIF5A	0,14336	0,393382					PCBP1	0,069526	0,163037
RAP2B	0,14344	0,393683					Sphingosine	0,070094	0,164576
NT5C3A	0,14408	0,395936					LCP1	0,070405	0,16542
DPYSL2	0,14483	0,398635					PDXP	0,070832	0,166579
PSMD7	0,14521	0,400019					ITPA	0,070832	0,166579
NAE1	0,14562	0,401472					TPM3	0,070971	0,166955
Phosphoenolpyruvate	0,14564	0,401549					COPS4	0,071216	0,167619
GPX1	0,14576	0,401976					ENO2	0,071716	0,168982
AGO2	0,14638	0,404206					C20orf27	0,073224	0,173103
RAD23A	0,14713	0,406902					PDCD6IP	0,073667	0,174321
PAK2	0,14819	0,410732					GAPVD1	0,073686	0,174373
TXNL1	0,14836	0,411347					PRMT5	0,074094	0,175497
Folate	0,14977	0,416484					ACTC1	0,074108	0,175529
IDH1	0,15015	0,417846					ALDH1A1	0,074566	0,176793
HSPA1A	0,15085	0,420411					NAE1	0,074589	0,176858
RFESD	0,15139	0,422359					GSPT1	0,074808	0,177459
ATP6V1B2	0,15226	0,425575					CHMP4B	0,075021	0,178048
RAB11B	0,1526	0,426803					DCXR	0,076489	0,182111
MSN	0,15268	0,427117					TGM2	0,076983	0,183487
FN3K	0,15388	0,43154					C2	0,077444	0,184768
DNPH1	0,15437	0,433327					ENDOD1	0,077609	0,185233
RDX	0,15438	0,433386					KPNB1	0,078589	0,187969
YWHAB	0,15585	0,438839					PPP2CA	0,078842	0,18868
PGM2L1	0,1562	0,440141					ATG3	0,079252	0,189828
PSMA5	0,15654	0,441387					TTLL12	0,079323	0,19003
NQO2	0,15717	0,44377					Spermidine	0,079371	0,190164
GDI1	0,15841	0,448404					CNRIP1	0,079509	0,190548
PDCD6	0,15899	0,45058					DPYSL2	0,080294	0,192763
Hexadecenoyl_carnitine_acyl_C16_1_	0,15907	0,450874					RDX	0,080993	0,19473
BROX	0,15972	0,453309					USP9Y	0,081451	0,196031
ADD1	0,16088	0,457685					IGLV3_25	0,081451	0,196031
GSS	0,162	0,461954					FETUB	0,081451	0,196031
EIF4A2	0,16259	0,464174					IGHV1_2	0,081451	0,196031
GMPR2	0,163	0,465758					SERPINB6	0,081451	0,196031
ACTG1	0,1634	0,467271					CFHR5	0,081451	0,196031
gamma_L_Glutamyl_L_cysteine	0,16424	0,470454					F9	0,081451	0,196031
L_leucine	0,16475	0,472435					PDCD6	0,082342	0,198555
PSMC1	0,16574	0,476215					BROX	0,082408	0,19874
CTPS2	0,16649	0,479124					KEL	0,082649	0,199427
NAXE	0,16649	0,479124					HSPA4	0,084662	0,205177
ENOPH1	0,16649	0,479124					PSMF1	0,08547	0,207496
ATG3	0,16694	0,480842					D_Arabitol	0,085556	0,207748
CAPZA1	0,1675	0,483015					LANCL1	0,085993	0,209004
PRKAR1A	0,16754	0,483187					FAF1	0,086615	0,2108
AMP	0,16785	0,484378					PSMG3	0,086915	0,211669
IMP	0,16785	0,484378					CUL1	0,087238	0,212603
PSMC6	0,16788	0,484484					IGLV1_40	0,087418	0,213121
x1_3_Bisphosphoglycerate	0,16837	0,486383					PSMD2	0,088332	0,215775
ESD	0,16892	0,488531					ABHD14B	0,088374	0,215896
ORM1	0,1691	0,489227					TKT	0,088585	0,216511
EIF4E	0,17227	0,501607					RPS6KA3	0,090213	0,22127
PGK1	0,17239	0,502076					IGLV3_21	0,090326	0,221595
Glutathione	0,1725	0,502517					USP9X	0,090469	0,222015
MPP1	0,17259	0,502863					EIF2S3	0,090715	0,22274
L_valine	0,17302	0,504553					SGTA	0,091193	0,224142
acyl_C20_4	0,17353	0,506598					DERA	0,092004	0,226528
L_proline	0,17405	0,508638					GTPBP1	0,092082	0,226762
EIF4A1	0,17416	0,509073					L_serine	0,092256	0,227275
RAB21	0,17431	0,509676					AKR7A2	0,092294	0,227385
CA3	0,17475	0,511393					RBX1	0,092329	0,227488
PSMC5	0,17493	0,512098					ALDH16A1	0,092988	0,229435
PSME2	0,17585	0,515786					ADPRHL2	0,093496	0,230948
PFN1	0,17603	0,516484					FAH	0,094672	0,234443
UDP	0,17611	0,516827					COPS5	0,094814	0,234861
KRT1	0,17703	0,520468					PSMD5	0,094925	0,235196
FOPNL	0,17956	0,530649					LGALS3	0,094955	0,235286
GALT	0,17956	0,530649					PRDX1	0,094986	0,235376
CD44	0,17956	0,530649					RANGAP1	0,095095	0,235704
CNRIP1	0,18051	0,534454					FKBP4	0,095871	0,23802
PSMD13	0,18053	0,534543					GLOD4	0,095909	0,238132
UFC1	0,18149	0,538426					SRI	0,097825	0,243889
OXSR1	0,18216	0,541166					WNK1	0,098145	0,244857
CAPZB	0,18237	0,542027					CUL2	0,098868	0,247045
PKLR	0,18247	0,542391					PSMD14	0,098969	0,247352
ITPA	0,18282	0,543847					SERPING1	0,099028	0,247529
COPS7B	0,18388	0,548168					RGS10	0,099517	0,249014
PGP	0,18436	0,550136					ACLY	0,099839	0,249986
AKR7A2	0,18445	0,550491					IPO7	0,10028	0,251324
TXNDC17	0,18503	0,552857					Citrate	0,10102	0,253576
NME1	0,18541	0,554427					TetradecenoylCarnitine_acyl_C14_1_	0,10102	0,253576
KEL	0,18667	0,55961					PPP1R7	0,10115	0,253966
RPS17	0,18695	0,560778					CASP3	0,10163	0,255449
NUDCD1	0,18738	0,562551					RFESD	0,10203	0,256686
NSFL1C	0,18814	0,565719					PGD	0,10203	0,256663
FABP5	0,18838	0,56671					NANS	0,10244	0,257911
CUL1	0,18859	0,567544					PRDX2	0,1026	0,258431
PSMB7	0,18919	0,570054					GSTP1	0,10361	0,261521
CAPNS1	0,18923	0,570215					MAP2K3	0,10405	0,262887
RAB35	0,18925	0,570328					PSMD13	0,10436	0,263835
PPME1	0,18934	0,570684					RAB21	0,10465	0,264737
LANCL2	0,18964	0,571914					EicosapentaenoicAcid	0,10514	0,266257
KRT10	0,19001	0,573472					sn_glycero_3_Phosphoethanolamine	0,10566	0,267856
PEPD	0,19012	0,573928					ACOT7	0,10593	0,268693
ATP6V1H	0,19146	0,579549					RAB35	0,10598	0,268863
PSMG3	0,1921	0,582229					PSMC5	0,10614	0,269371
ERMAP	0,19237	0,583376					CFHR1	0,10667	0,271022
LASP1	0,19438	0,591845					DNAJB1	0,10715	0,272508
COPS3	0,19582	0,597945					PITPNB	0,10747	0,273493
DMTN	0,19596	0,598548					SELENBP1	0,10751	0,273631
STIP1	0,19946	0,613501					KRT5	0,10766	0,274113
MTAP	0,19982	0,615056					YOD1	0,10777	0,274448
GLIPR2	0,20008	0,616167					KRT9	0,10791	0,274873
MYL12A	0,2005	0,617983					DBNL	0,10801	0,2752
LCP1	0,20072	0,618921					ATIC	0,10849	0,276709
YWHAQ	0,20111	0,620604					TetradecenoicAcid_myristoleicAcid_	0,10875	0,277514
PDCD6IP	0,20177	0,623496					MTHFD1	0,10875	0,277514
CCT7	0,20285	0,628157					GBE1	0,10881	0,277712
UBE2K	0,20379	0,632271					GLO1	0,10941	0,279601
HMBS	0,20538	0,639217					DNM2	0,11013	0,281856
CCT4	0,20563	0,640297					CAP1	0,11083	0,284089
IDE	0,20571	0,640677					ADD2	0,11095	0,284448
RPS6KA3	0,20681	0,645527					TPT1	0,11124	0,285377
CARHSP1	0,20726	0,64747					IGLV3_27	0,11403	0,294273
PCBP2	0,20784	0,650043					IGLV1_51	0,11403	0,294273
PRDX2	0,20847	0,652865					VWF	0,11403	0,294273
OLA1	0,20871	0,653921					IGHV3_7	0,11403	0,294273
GTPBP1	0,20915	0,655863					IGKV1_27	0,11403	0,294273
RALA	0,2108	0,66322					IGLV1_44	0,11403	0,294273
HPRT1	0,21154	0,666492					IGHV1_24	0,11403	0,294273
USP9Y	0,21221	0,669505					F13B	0,11403	0,294273
IGLV3_25	0,21221	0,669505					CPB2	0,11403	0,294273
FETUB	0,21221	0,669505					IGHV3_21	0,11403	0,294273
IGHV1_2	0,21221	0,669505					CPN1	0,11403	0,294273
SERPINB6	0,21221	0,669505					IGHV2_5	0,11403	0,294273
CFHR5	0,21221	0,669505					ATRN	0,11403	0,294273
F9	0,21221	0,669505					FBLN1	0,11403	0,294273
LHPP	0,21236	0,670175					ECM1	0,11403	0,294273
PFKM	0,21307	0,673377					YWHAB	0,11464	0,296227
CASP3	0,21323	0,674074					PSMD11	0,11477	0,296657
TGM2	0,21382	0,676769					RAB5C	0,11484	0,296872
HUWE1	0,21431	0,67894					STOM	0,11525	0,298199
PPIL1	0,21435	0,679148					TARS	0,11526	0,298216
CDC37	0,21447	0,679688					AIDA	0,1156	0,299296
GSTP1	0,21465	0,680498					YWHAQ	0,11616	0,301126
WDR91	0,21482	0,681269					IDE	0,11646	0,302074
HSPA4	0,2152	0,682961					DHX9	0,11687	0,303416
L_Palmitoylcarnitine_acyl_C16_	0,2164	0,688416					LXN	0,11688	0,303443
ATIC	0,21666	0,689583					SNX2	0,11714	0,304291
CALR	0,21671	0,689838					LUM	0,11812	0,30747
HBB	0,21692	0,690753					PFAS	0,11848	0,308653
TAGLN2	0,21748	0,693339					C9	0,11883	0,309777
GOT1	0,21765	0,694133					AMBP	0,11954	0,312088
TSG101	0,21928	0,701562					NT5C3A	0,11955	0,312132
TIPRL	0,22213	0,714713					FABP5	0,11963	0,3124
PPP2R1A	0,22297	0,718603					CUL3	0,11964	0,312409
PRMT5	0,223	0,718739					OLA1	0,11965	0,312444
PSMA2	0,22342	0,720698					BLVRA	0,11974	0,312757
butanoyl_l_carnitine_acyl_C4_	0,22363	0,721658					PSMC2	0,11989	0,313257
Cys_Gly	0,22466	0,726466					PAFAH1B1	0,11991	0,31331
ANXA5	0,22529	0,729391					PPIL1	0,12008	0,313855
HNRNPA1	0,2253	0,729438					RANBP1	0,1202	0,314258
x6_Phospho_D_gluconate	0,2257	0,731282					IPO9	0,12068	0,315828
L_serine	0,22621	0,733698					KRT1	0,12199	0,320127
L_phenylalanine	0,22776	0,74098					PRKAR1A	0,12219	0,320817
RANGAP1	0,2287	0,745404					APEH	0,12253	0,32191
LDHA	0,22881	0,745936					AP2A1	0,12346	0,325001
PHPT1	0,22921	0,747803					PAFAH1B3	0,12503	0,330237
RAB8A	0,22958	0,749556					x2_3_Phospho_D_glycerate	0,12524	0,330934
IAH1	0,22958	0,749556					ITIH3	0,12674	0,33596
HNRNPF	0,22958	0,749556					SKP1	0,1277	0,339172
SARS	0,22958	0,749556					PRPSAP2	0,12815	0,340673
CSNK2B	0,22958	0,749556					PRPS2	0,12823	0,340968
SH3GLB2	0,23111	0,756863					ANXA5	0,12847	0,341769
UCHL3	0,23123	0,757434					KRT10	0,12976	0,346151
L_MethionineS_oxide	0,23189	0,760575					TXNRD1	0,13049	0,348615
ACAT2	0,23256	0,76379					ARHGAP1	0,13052	0,348712
PPP1R7	0,23309	0,766293					GMPR2	0,13058	0,348916
BAG6	0,23422	0,771754					CLTC	0,13073	0,349421
DNM2	0,23535	0,77718					CTPS1	0,13122	0,351084
ALDOA	0,23555	0,778143					RAC1	0,13225	0,354597
GNB2	0,23569	0,778821					PPA1	0,13256	0,35567
CPNE1	0,23634	0,781937					UGP2	0,13274	0,356291
Indole	0,23757	0,787946					gamma_L_Glutamyl_L_cysteine	0,13297	0,357091
GLOD4	0,23806	0,790271					WBP2	0,1345	0,36234
x2_3_Phospho_D_glycerate	0,23809	0,790458					CLIC2	0,13564	0,366299
TRIM58	0,23868	0,793336					ALDH9A1	0,1372	0,371703
THG1L	0,23907	0,795202					HBQ1	0,1373	0,37204
PPP2CA	0,24116	0,805458					GAPDH	0,13743	0,372511
EHBP1L1	0,24143	0,806792					Biliverdin	0,13813	0,374935
CUL3	0,24184	0,808829					ACTG1	0,13855	0,37643
GYPA	0,24238	0,811465					ARF1	0,13906	0,37819
PCNP	0,24239	0,811493					TSG101	0,14033	0,382654
PRPSAP2	0,24279	0,813467					Indole_3_acetate	0,1407	0,383976
CCT6A	0,24316	0,81528					IGHV1_46	0,14084	0,38445
CCT2	0,24373	0,818156					LBP	0,14084	0,38445
CARM1	0,24442	0,821541					PCNP	0,14094	0,384818
ACTBL2	0,24486	0,823735					RAD23A	0,14141	0,386475
HDDC3	0,24486	0,823735					PIP4K2A	0,14251	0,390363
UBQLN1	0,24486	0,823735					D_Erythrose4_phosphate	0,14277	0,391281
PPP2R1B	0,24487	0,823793					CAPNS1	0,14357	0,394135
PSMA7	0,24525	0,825678					PSMD1	0,14368	0,394523
WNK1	0,24712	0,834993					LDHB	0,14418	0,396325
USP7	0,24922	0,845576					FKBP3	0,14451	0,397473
ASL	0,24942	0,846551					CTPS2	0,14473	0,398277
Argininosuccinate	0,24961	0,847528					NAXE	0,14473	0,398277
SPTB	0,25107	0,854897					ENOPH1	0,14473	0,398277
PAFAH1B1	0,25225	0,860908					L_cystine	0,14645	0,404438
COPS4	0,25328	0,86611					ACTBL2	0,14661	0,405033
PFAS	0,25457	0,872733					HDDC3	0,14661	0,405033
PSMD6	0,25494	0,874616					UBQLN1	0,14661	0,405033
COL1A1	0,25624	0,881305					SLC43A3	0,14728	0,407424
IPO7	0,25665	0,883425					GSTM3	0,1473	0,407501
O_dodecanoyl_carnitine_acyl_C12_	0,25668	0,883592					GOT1	0,14756	0,408468
KPNA4	0,25699	0,885189					CAPZB	0,14829	0,411101
Bilirubin	0,25823	0,891604					SERPINA1	0,14922	0,41446
RAD23B	0,25901	0,895649					RPS17	0,15001	0,417323
UBAC1	0,25981	0,899802					L_lysine	0,15307	0,428559
PSMD9	0,25988	0,900181					IGHV1_18	0,15321	0,42906
CHORDC1	0,26021	0,901876					TUBB4B	0,15325	0,429212
SUGT1	0,26022	0,901945					ASL	0,15498	0,435606
DPP3	0,26147	0,908474					BSG	0,15538	0,437101
HNRNPK	0,26252	0,913925					HSPA1A	0,15648	0,441171
AP2A1	0,2627	0,914888					RAP2B	0,15701	0,443167
PAFAH1B2	0,26274	0,915138					NME2	0,15746	0,444821
RIDA	0,26346	0,918905					Pyridoxamine5__phosphate	0,15771	0,445777
UBE2L3	0,26384	0,920891					CFI	0,15861	0,44916
RANBP1	0,26504	0,927236					THG1L	0,15885	0,450029
DNAJA4	0,26511	0,92764					HBD	0,1611	0,458533
PAICS	0,2657	0,930739					EIF1AY	0,16128	0,45922
NAP1L1	0,26572	0,930813					PSMB5	0,1614	0,459645
NANS	0,26673	0,936179					USP14	0,16172	0,460886
HINT1	0,26734	0,939453					IMP	0,16235	0,463265
SKP1	0,26754	0,940512					ANK1	0,16271	0,464643
ANK1	0,27029	0,955186					AHCY	0,1639	0,469186
PSMB5	0,27085	0,958213					EZR	0,16437	0,470955
BSG	0,27307	0,970251					PSME2	0,16476	0,472486
RHOA	0,27363	0,973263					IGKV1D_12	0,1656	0,475682
PSMD4	0,27421	0,976418					Guanosine	0,16629	0,478352
MAP2K2	0,27449	0,977943					KRT13	0,16721	0,481894
IPO9	0,27456	0,978315					SH3GLB2	0,16793	0,484669
PIN1	0,27529	0,982299					UDP_N_acetyl_D_glucosamine	0,16802	0,485027
WDR1	0,2765	0,988895					USP7	0,16863	0,487409
GAPDH	0,27724	0,993021					TSTA3	0,16955	0,490972
VPS13A	0,27751	0,994433					MTAP	0,17025	0,493711
ZZEF1	0,27751	0,994433					DPP3	0,17051	0,494714
RAB6B	0,27751	0,994433					alpha_D_Glucosamine1_phosphate	0,17111	0,497082
USO1	0,27751	0,994433					PRPSAP1	0,17158	0,498886
ROCK2	0,27751	0,994433					KRT14	0,17214	0,501125
HGS	0,27751	0,994433					CSE1L	0,17244	0,502269
PTPN7	0,27751	0,994433					CDC42	0,17432	0,509704
CD55	0,27751	0,994433					PPP2R1B	0,17455	0,510604
ENO3	0,27751	0,994433					PSMD3	0,17544	0,514151
NUDT4B	0,27751	0,994433					L_tyrosine	0,17575	0,515387
DCTN3	0,27751	0,994433					RIC8A	0,17763	0,522893
CHMP4A	0,2777	0,995507					CAPZA1	0,17802	0,524445
APEH	0,27813	0,997834					YBX3	0,1782	0,525172
CAST	0,27894	1002325					HBZ	0,17844	0,526119
PA2G4	0,27971	1006577					ACSL4	0,17919	0,529149
FKBP3	0,28086	1012946					RHOA	0,1796	0,530797
PCBP1	0,28102	1013838					MAP2K2	0,18004	0,532569
x8_Methoxykynurenate	0,28114	1014502					CRLF3	0,18096	0,536286
CA1	0,28437	1032536					RAB8A	0,18108	0,536749
WBP2	0,28686	1046554					IAH1	0,18108	0,536749
PRPSAP1	0,28987	1063652					HNRNPF	0,18108	0,536749
TXNRD1	0,28997	1064236					SARS	0,18108	0,536749
USP9X	0,29217	1076818					CSNK2B	0,18108	0,536749
NAP1L4	0,29315	1082416					FKBP1A	0,18315	0,545201
FKBP1A	0,29344	1084131					HSPA8	0,1839	0,548229
PGD	0,29378	1086048					UFC1	0,18402	0,54872
MAPRE1	0,29453	109038					x5_Hydroxyindoleacetate	0,18503	0,552857
LDHB	0,29517	1094096					PGAM1	0,18519	0,553541
RUVBL2	0,29545	1095739					CA2	0,18584	0,55619
CUL2	0,29748	1107533					APCS	0,18598	0,556768
GAPVD1	0,2995	1119369					PSMB2	0,18616	0,55752
KPNA6	0,29977	112095					DCTN2	0,18657	0,559217
ADK	0,29986	1121507					BAG6	0,18699	0,560952
Choline	0,3011	1128772					PSMA1	0,18729	0,56217
EEF2	0,30236	1136196					CAND1	0,18734	0,562392
NUTF2	0,30471	1150206					HNRNPA1	0,1875	0,563027
PRPS2	0,3067	1162058					CARS	0,18758	0,56336
CLIC2	0,30689	1163239					RNF123	0,19061	0,575985
PPP6C	0,30712	1164608					NPEPPS	0,19106	0,577854
hexanoyl_L_carnitine_acyl_C6_	0,30833	1171875					HSP90AB1	0,19141	0,579302
UGP2	0,30976	1180502					SPTB	0,19152	0,57978
TMOD1	0,3108	1186813					TRIM58	0,19276	0,584977
PicolinicAcid	0,31091	1187494					G6PD	0,19366	0,588784
CCT5	0,31111	1188713					LAP3	0,19377	0,589256
MAP2K3	0,31178	1192756					O_tetradecanoyl_L_carnitine_acyl_C14_	0,19379	0,589341
ATG4A	0,31197	1193935					CHORDC1	0,19416	0,590896
CAPZA2	0,31232	1196031					PSMA5	0,19436	0,591743
PSAT1	0,31347	1203107					DocosahexaenoicAcid	0,19482	0,593698
ATP1A1	0,31402	1206482					CSNK1A1	0,19586	0,598117
EIF2S1	0,31502	1212603					PSMB6	0,19699	0,602929
GSPT1	0,31584	1217635					EIF4G1	0,19756	0,605338
CDC42	0,3162	1219841					THOP1	0,19812	0,60776
BLVRA	0,31683	1223771					LHPP	0,19914	0,61213
O_Decenoyl_L_carnitine_acyl_C10_1_	0,31711	1225476					FLOT2	0,19959	0,614054
EIF4G1	0,31779	1229678					MAPRE1	0,20002	0,615916
CZIB	0,31795	1230667					CA3	0,2007	0,618831
PSMD14	0,31846	1233818					RUVBL2	0,20157	0,622603
TTLL12	0,32028	124517					UDP	0,20204	0,624629
FKBP4	0,32101	1249762					ATG4A	0,20241	0,626242
UBR4	0,32134	1251781					Choline	0,20307	0,629117
EIF1AY	0,32297	126206					CD47	0,20404	0,633372
KRT13	0,32326	1263867					CZIB	0,2042	0,634063
KPNB1	0,32381	1267349					ATP6V1A	0,20669	0,644989
D_Erythrose4_phosphate	0,32434	1270673					CPNE1	0,20828	0,652007
MCTS1	0,32719	1288767					CCT3	0,20858	0,653334
MTHFD1	0,32822	1295335					NAP1L4	0,2097	0,658289
TBCA	0,32837	1296296					KPNA4	0,20992	0,659298
N_formylKynurenine	-0,59406		3874324				GART	0,21016	0,66033
Mannitol	-0,59135		3836064				PLIN3	0,21135	0,665667
Lactate	-0,58154		3700231				FOPNL	0,21177	0,667541
L_tryptophan	-0,57896		3665205				GALT	0,21177	0,667541
gamma_Glutamyl_gamma_aminobutyrate	-0,56346		3461024				CD44	0,21177	0,667541
Creatine	-0,5459		3241459				HSP90AA1	0,21247	0,670663
x2_Hydroxyglutarate_Citramalate	-0,53919		3160648				EEF1A1P5	0,21272	0,671824
Dopamine	-0,53055		305906				ASNA1	0,21275	0,671947
L_Tryptophanamide	-0,52473		299221				x2_Oxoglutaramate	0,21286	0,672416
Cytidine	-0,52421		298632				CAPZA2	0,21306	0,673316
L_aspartate	-0,51492		2882066				Bilirubin	0,21337	0,674731
CPNE3	-0,51111		2840192				ESD	0,21356	0,675573
kynurenine	-0,49891		2709253				SAA1	0,21387	0,676954
Formyl_5_hydroxy_kynurenamine	-0,49891		2709253				AKR1C3	0,21591	0,686217
Xanthine	-0,48754		2591573				ATP1A1	0,21695	0,690924
DNPEP	-0,47342		2450727				L_Citrulline	0,21853	0,698124
Serotonin	-0,47153		243235				AP2B1	0,2188	0,699383
Phosphate	-0,43951		2135619				NAP1L1	0,21902	0,700362
RRM1	-0,4364		2108262				GSS	0,22359	0,721475
gamma_L_Glutamyl_D_alanine	-0,41627		1937005				TXNDC17	0,22523	0,729112
Indoxyl	-0,39819		1791532				PSMC4	0,22603	0,732828
Adenosine	-0,39716		1783465				TIPRL	0,23026	0,752788
x4_Pyridoxate	-0,37702		163058				HSPB1	0,23191	0,760675
Pantothenol	-0,37702		163058				RAD23B	0,23197	0,760926
APOA1	-0,36812		1565846				HRNR	0,23215	0,761803
L_glutamate	-0,36721		155928				DNAJB2	0,23443	0,772756
trans_4_Hydroxy_L_proline	-0,36204		152256				LRG1	0,23483	0,774665
ALB	-0,35845		1497341				VCP	0,23525	0,776686
SMIM1	-0,35119		144721				COL1A1	0,23689	0,784627
RHD	-0,35119		144721				L_methionine	0,23708	0,785554
IGHM	-0,34977		1437505				UROD	0,23991	0,799341
AHSG	-0,34919		1433527				acyl_C4_OH_Hydroxybutyrylcarnitine_	0,24018	0,800629
A2M	-0,34504		1405541				GYPA	0,24188	0,808996
Fumarate	-0,33983		1370835				ATP6V1G1	0,24295	0,814288
TF	-0,3391		1366007				SLC4A1	0,24314	0,815195
Phosphoserine	-0,33312		1326868				PPP6R3	0,24422	0,820534
							CNDP2	0,24955	0,847192
HSP90AB1	0,32929			1302143			DIAPH1	0,24982	0,848569
CNDP2	0,332			1319601			x5_Aminopentanoate	0,25048	0,851922
PAFAH1B3	0,3335			1329346			CAST	0,25076	0,853314
DIAPH1	0,33369			1330599			COPS7B	0,25174	0,858299
CCT3	0,33489			1338358			KPNA6	0,25332	0,866365
AHCY	0,33547			1342141			TUBA1B	0,25401	0,869859
RBX1	0,33561			1343049			GNB2	0,25642	0,882232
TARS	0,33602			1345775			EHBP1L1	0,257	0,885222
ACLY	0,3371			1352852			NUTF2	0,25764	0,888536
PLIN3	0,33746			1355158			PTPA	0,25767	0,888704
IPO5	0,33786			1357822			ORM1	0,2595	0,898184
ASNA1	0,33797			1358546			RIDA	0,25969	0,899147
NME2	0,33914			1366259			AARS	0,2635	0,919085
x_S_____Allantoin	0,33932			1367421			HNRNPH1	0,26368	0,920096
USP14	0,33988			1371151			UCHL3	0,26617	0,933227
CTPS1	0,34115			1379562			ADK	0,26679	0,936517
SRI	0,34153			1382078			MYH9	0,26943	0,950627
UBE2D2	0,34274			1390139			SERPINA3	0,26988	0,953037
PSMB3	0,34299			1391806			x5_6_Dihydrothymine	0,27213	0,965131
FLOT2	0,34468			1403084			EIF3J	0,27319	0,9709
Guanosine	0,34544			1408212			CMPK1	0,27401	0,975309
SELENBP1	0,34593			1411493			PSMD12	0,27481	0,97968
EZR	0,34674			1416949			YBX1	0,27561	0,984012
ARIH2	0,34763			1422945			VPS13A	0,27693	0,991272
N_Succinyl_L_glutamate5_semialdehyde	0,3481			1426142			ZZEF1	0,27693	0,991272
CAND1	0,34909			1432844			RAB6B	0,27693	0,991272
CAP1	0,34957			1436139			USO1	0,27693	0,991272
PTPA	0,34981			143779			ROCK2	0,27693	0,991272
HSPA8	0,35225			1454433			HGS	0,27693	0,991272
CDV3	0,35395			1466126			PTPN7	0,27693	0,991272
DNAJB2	0,35476			1471726			CD55	0,27693	0,991272
x3_Sulfocatechol	0,35636			1482804			ENO3	0,27693	0,991272
CRLF3	0,3572			1488638			NUDT4B	0,27693	0,991272
FASN	0,35739			1489978			DCTN3	0,27693	0,991272
PSMC2	0,35782			1492968			HBB	0,27728	0,993235
WDR77	0,35855			1498051			EEF2	0,27987	1007486
CSNK2A1	0,35872			1499229			DCTN1	0,28064	1011718
TXN	0,35881			1499846			ARIH2	0,28074	1012289
PSMA6	0,36059			1512339			PSMB3	0,28795	1052738
CLTC	0,36174			1520396			YARS	0,2884	1055305
ATP6V1A	0,36194			1521852			Allantoate	0,28862	105655
PSMD2	0,36519			1544866			CDV3	0,289	1058672
PSMC4	0,36546			1546758			TXN	0,29007	1064805
TNPO1	0,36626			1552501			Indole	0,29223	1077155
OPTN	0,36636			155323			HBG1	0,29373	1085768
ACOT7	0,36678			1556205			RUVBL1	0,29418	1088368
CARS	0,36699			155774			UBE2D2	0,29763	110839
L_octanoylcarnitine_acyl_C8_	0,36721			155928			PSMD9	0,29939	1118695
DCTN2	0,3679			1564219			XPO4	0,30114	1129029
CYB5R3	0,36822			1566534			L_threonine	0,30151	1131179
ALDH9A1	0,37198			1593732			D_Ribose	0,30151	1131179
HDDC2	0,37201			1593937			L_Arabinose	0,30151	1131179
PSMB2	0,37284			1599929			FH	0,30265	1137934
x3_Methyldioxyindole	0,3734			1604062			N_Acetylneuraminate	0,30305	1140333
XPO4	0,37396			1608095			Inosine	0,30563	1155678
L_tyrosine	0,37547			1619174			PNPO	0,30881	1174743
PSMD3	0,37957			1649461			Ascorbate	0,31027	11836
SEC14L2	0,38075			1658209			N_Succinyl_L_glutamate5_semialdehyde	0,31697	1224608
UFM1	0,38145			166342			butanoyl_l_carnitine_acyl_C4_	0,31749	1227796
L_lysine	0,38322			1676665			CSNK2A1	0,31928	123893
AP2B1	0,38429			1684702			CRP	0,32032	1245399
EIF2S3	0,38537			1692846			x3_Methyldioxyindole	0,32264	1259953
PSMD11	0,38544			1693425			CHMP4A	0,32516	1275839
PRDX1	0,38565			169495			YWHAH	0,32518	1275962
Allantoate	0,3858			1696113			MYH10	0,32712	1288286
LAP3	0,38581			1696221			CALR	0,32734	128968
O_tetradecanoyl_L_carnitine_acyl_C14_	0,38787			1711773			TNPO1	0,32895	1300015
FH	0,38904			1720698			Cytidine	-0,62672		4364275
ATP6V1G1	0,38936			1723217			CPNE3	-0,53706		3135418
PPP6R3	0,39109			1736459			Dopamine	-0,52945		3046371
acyl_C4_OH_Hydroxybutyrylcarnitine_	0,39458			1763362			L_aspartate	-0,49684		2687611
RNF123	0,39651			1778351			Mannitol	-0,47984		2513981
TPT1	0,39679			178052			Creatine	-0,4788		2503735
GSR	0,39909			1798576			GSN	-0,47523		2468496
HNRNPH1	0,40271			1827193			L_tryptophan	-0,46901		2407968
PSMB6	0,40442			1840824			DNPEP	-0,45657		2290238
CA2	0,40524			1847375			Serotonin	-0,41541		1929888
PSMD1	0,40552			184952			Lactate	-0,39634		177705
HBZ	0,40956			1882066			N_formylKynurenine	-0,39582		1773014
G6PD	0,4096			188243			RRM1	-0,3941		175965
x5_6_Dihydrothymine	0,41059			1890455			EIF4A3	-0,38423		1684261
NPEPPS	0,41328			1912361			APOA1	-0,38309		1675697
XPO7	0,4155			1930628			TTR	-0,38062		1657262
CMPK1	0,42302			199332			Sedoheptulose1_phosphate	-0,37882		1643859
RIC8A	0,42496			2009692			ALB	-0,36518		154482
AKR1C3	0,42604			2018834			gamma_Glutamyl_gamma_aminobutyrate	-0,35459		147057
TSTA3	0,42798			2035396			Diphosphate	-0,34325		1393565
Guanine	0,4297			2050113			Xanthine	-0,34171		1383262
SLC4A1	0,4325			2074306			TF	-0,33943		1368181
Inosine	0,4328			2076849			Phosphocreatine	-0,33759		1356015
SLK	0,43458			2092341			AHSG	-0,33634		134786
YBX3	0,43755			2118364			L_glutamate	-0,33449		1335791
EIF3J	0,43757			2118513			OPTN	0,32905			1300605
YBX1	0,43913			2132273			PSMA6	0,33081			1311936
BPNT1	0,44354			2171398			O_dodecenoyl_carnitine_acyl_C12_1_	0,33398			1332435
PSMA1	0,44378			2173601			CYB5R3	0,33511			133978
GART	0,4439			2174613			Guanine	0,33707			1352627
L_Citrulline	0,44519			2186252			S100A6	0,3372			1353488
TUBB4B	0,44855			2216604			SLK	0,33731			1354195
D_Rhamnose	0,44984			222831			x6_Phospho_D_gluconate	0,34532			1407379
x5_Aminopentanoate	0,45036			2233022			RALA	0,35061			1443239
PNPO	0,45866			2309706			D_Rhamnose	0,3515			1449319
L_arginine	0,46327			2353087			Ornithine	0,35202			1452841
UROD	0,46784			2396693			YWHAE	0,35258			1456739
LGALS3	0,47109			2428082			SEC14L2	0,35566			1477947
DCTN1	0,47208			2437671			HSPBP1	0,35815			1495271
AARS	0,47312			2447758			XPO7	0,35939			1503901
CPPED1	0,47428			2459095			CPPED1	0,37022			158092
ACTN4	0,47573			2473389			octenoyl_l_carnitine_acyl_C8_1_	0,37366			1605969
PGAM1	0,4769			2484895			x_S_____Allantoin	0,38449			1686217
L_threonine	0,47721			2487983			PicolinicAcid	0,385			1690093
HSPB1	0,47865			2502172			O_dodecanoyl_carnitine_acyl_C12_	0,38552			1693983
VCP	0,48129			2528518			L_phenylalanine	0,38706			1705688
GSTM3	0,48282			2543801			AP2M1	0,38805			1713207
Creatinine	0,48393			2554957			x3_Sulfocatechol	0,39016			1729275
YWHAH	0,49119			2628895			HBG2	0,39217			1744727
HSPBP1	0,49365			2654371			HDDC2	0,3925			1747244
AP2M1	0,49626			2681519			x8_Methoxykynurenate	0,39376			1757012
TUBA1B	0,49637			2682668			BPNT1	0,40349			1833392
HSP90AA1	0,50239			2746202			UFM1	0,4183			1953778
PSMD12	0,50538			2778143			ACTN4	0,4183			1953778
YWHAE	0,50773			2803437			TBCA	0,42065			1973426
YARS	0,51163			2845941			L_Homoserine	0,42417			2003025
L_histidine	0,51233			2853624			Anthranilate	0,42623			2020502
NAMPT	0,5173			2908474			GSR	0,44235			2160786
S100A6	0,5218			2959002			NAMPT	0,46085			2330283
MYH10	0,53497			3110743			L_MethionineS_oxide	0,46953			241294
RUVBL1	0,53545			3116418			TMOD1	0,47537			24698
L_Homoserine	0,53919			3160648			L_arginine	0,47777			2493522
HBG1	0,54887			3277761			O_Decenoyl_L_carnitine_acyl_C10_1_	0,49066			2623441
MYH9	0,54903			3279634			SH3BGRL3	0,51055			2834073
HBG2	0,55208			3317368			MYL4	0,53669			313098
Anthranilate	0,57431			3602877			L_octanoylcarnitine_acyl_C8_	0,54838			3271744
L_methionine	0,57792			3651267			Argininosuccinate	0,55596			3365684
EEF1A1P5	0,58326			3723768			Guanidinoacetate	0,55972			3413221
Ornithine	0,63628			4518385			hexanoyl_L_carnitine_acyl_C6_	0,57158			3566678
MYL4	0,64876			4727485			L_histidine	0,62363			4315523
Guanidinoacetate	0,6745			5190084			Urate	0,70146			5725611
SH3BGRL3	0,6834			5360603			Creatinine	0,76537			7266185
Urate	0,72305			6198713			echi	0,82834			9346093
shape_ratio	0,82834			9346093
